# Supplementary material
Source: publisher site journal article supplement (https://www.spandidos-publications.com/7884/downloadSupplementary)
Supplement: Supplementary file 1 [file downloadSupplementary]

## Sheet: lambda.min
Table SII. Multivariate Cox statistics for the 12 initial genes.
event	time	RiskScore	KRT5	KRT17	PKP1	KRT15	FLG	CSTA	CRABP2	CST6	CALML5	CDH3	S100A8	CTSG
dead	518	0.891397	7.65253	8.05567	2.5764	3.01669	0.737515	3.8284	5.76869	2.57044	5.34374	3.29987	8.15442	3.26209
alive	2022	0.00394967	0.406914	0.391305	0.0140553	0.0123567	0.325181	3.03892	3.07164	1.02961	0.0986713	2.97536	4.4337	0.0624736
dead	395	1.20367	6.32168	6.07655	2.13677	1.72019	0.0336054	3.10487	4.53962	0.992393	10.0697	4.65022	3.11925	0.774477
alive	387	1.26288	6.37908	7.43463	3.4864	2.01584	1.97442	1.51727	5.61042	4.72745	4.54567	7.24277	4.59773	1.15643
alive	14	1.43821	5.73703	6.76749	1.07343	1.13253	0.348946	1.40668	5.37072	0.619308	0.491647	7.65557	5.01436	0.980471
dead	282	1.80092	12.5303	9.7579	8.98513	5.70166	2.68531	7.5935	9.10775	2.46788	9.35906	7.15672	11.7978	5.24137
alive	853	0.610757	3.62345	1.1343	1.97417	0.883497	0.904706	3.08091	3.99182	0.682815	1.01159	6.67711	4.89133	1.09545
alive	831	0.538654	5.02089	6.47425	1.64986	1.98898	0.149494	2.66989	5.23008	4.20316	3.56908	2.46449	4.88988	1.33305
alive	464	1.19421	9.43134	10.5944	5.89497	1.21305	0.773839	6.87492	7.31563	4.48178	6.23095	7.29115	10.7372	3.0794
alive	769	0.733094	2.05165	2.3801	0.786276	0.0102837	0.733358	1.0483	3.7941	0	0.160582	4.0694	3.3785	0.102467
alive	601	0.69049	0.262763	2.41828	0.549379	0.0370191	1.62538	1.58847	5.98293	0.718557	0	5.20157	1.97168	3.05488
alive	717	0.75504	4.22684	4.07504	1.47103	0.614625	1.11781	1.55975	5.12324	0.0945969	0.969415	2.87308	2.97291	3.70227
alive	703	1.85921	10.7389	10.5038	6.3728	2.31251	1.00635	5.31639	7.84248	1.38603	1.58306	6.52955	9.80163	1.0801
alive	335	0.472729	1.19356	2.0782	0.19196	0.118979	1.38288	1.03291	5.14168	0.726898	0	5.31703	1.79543	5.62084
alive	323	0.855753	3.83354	3.29422	1.34869	0.631577	0.00562289	2.39007	4.39864	0.783602	2.43406	6.92579	3.93547	1.66618
alive	327	1.17361	6.92381	7.14947	2.60273	0.223609	1.69731	2.54308	4.88347	0.19709	0.331917	3.22956	5.15253	1.03648
alive	490	0.438416	0.310935	0.520059	0.0158972	0.02782	0.711104	1.76803	4.4608	0.125214	0	3.82768	2.73938	0.263448
alive	440	1.25688	9.40883	10.3572	5.12486	0.460019	2.68943	6.83107	5.74644	3.31582	7.34064	5.85166	9.09629	0.848921
alive	476	1.11366	7.00191	7.98045	2.83904	0.611124	0.320595	3.28611	5.33845	0.793437	0.256229	3.06235	7.97144	0.360099
alive	444	1.22827	9.06189	9.61998	5.14049	3.08777	2.66776	5.14928	6.69647	6.03217	7.8748	7.25898	9.50315	1.15444
alive	454	0.0669983	0.490552	0.272162	0.297453	0.0630984	0.179165	4.59063	6.70373	1.52292	0.689909	6.51296	4.52624	4.76055
alive	409	0.735977	4.00336	5.33531	1.44261	0.326555	1.03878	3.43162	3.65153	0.558913	0.503935	3.65254	5.67756	0.377082
alive	405	1.14224	8.79507	9.21645	5.22528	2.90058	2.90361	6.73138	6.63542	5.23981	8.86013	7.08401	9.26815	1.58966
alive	335	0.35329	1.47597	2.08863	0.24569	0.369504	0.695066	2.34105	4.66914	0.110981	0.359086	3.08974	4.02355	3.08901
alive	325	1.09587	3.65742	3.11434	4.27158	1.35384	0.873068	2.41052	5.1115	0.808042	0.33956	6.37902	2.88777	1.65845
alive	318	1.59579	10.3924	9.57259	6.22717	2.72974	0.695025	6.00771	7.23174	1.79694	7.4433	6.31793	9.26648	2.80109
alive	447	0.641147	0.791149	0.804549	0.171452	0.0264164	0.635413	1.43965	5.85803	0.331316	0	3.96158	1.15935	0
dead	504	1.00285	0.181668	0.19468	3.88014	0	1.58121	0.687214	6.04591	0	0.0853634	4.36321	1.57426	0.0539564
dead	507	0.527483	0.153309	0.0668387	0.438401	0	1.14891	2.92058	3.30671	0.0742774	0	7.25433	1.95234	0.401673
alive	3408	0.470342	0.206268	1.18805	1.76118	0	0.978447	1.92703	6.30582	0.195167	0	1.7151	1.7674	2.60436
dead	3424	-0.253823	0.231806	1.03784	0.0488141	0.0639941	1.1313	4.96715	6.29163	2.78951	0	0.838633	2.06594	1.43894
dead	2184	0.421753	0.107974	0.705818	0.52643	2.62118	1.20685	2.21536	7.93613	0.975851	0	0.492112	4.88656	0.196171
alive	4053	0.249148	0.901282	0.387468	0.876971	0.0093533	1.88395	3.60702	4.36775	0.313028	0.0752257	5.00482	4.04385	2.66008
dead	854	0.0834004	1.11717	0.871446	0.220414	0.233355	1.15823	3.05483	6.4606	0.774782	0.249082	1.44463	3.33125	3.45616
dead	961	0.489037	1.69834	2.1786	1.28731	0.584821	1.02119	1.91612	2.38224	0.312479	0.214454	3.16976	3.6274	0.180902
alive	2765	0.190627	0.0861428	0.700038	0.0363427	0.010739	1.30987	4.51652	1.44812	0	0	7.93273	1.33487	3.50826
alive	2765	0.44649	0.0783686	1.10895	0.0275616	0.0121731	0.808875	2.66047	1.2396	0.109585	0	7.2467	1.67944	0.800002
alive	2912	0.965743	0.865744	0.445012	4.01808	0.00932397	1.05818	2.95915	9.66625	0.446071	0	4.19738	4.20909	0.0931765
dead	1321	0.407346	3.02778	2.319	0.436895	0.390403	0.487605	2.1743	3.59942	0.482594	1.10656	2.10952	3.33302	0.24865
dead	3136	0.377963	0.417056	1.86646	0.141365	0.409138	0.54372	2.75768	4.94102	1.03777	0	6.07121	2.31397	4.0773
dead	1992	-0.272192	0.700306	0.377969	0.332364	0.450735	0.576196	3.25237	3.1109	1.46817	0	1.01791	6.31064	1.05208
dead	723	0.174955	1.65017	0.819042	0.495407	0.0956804	0.236641	3.93318	3.39253	0.262517	0.0983318	3.44377	4.01323	0.207068
alive	3514	0.100271	2.27775	1.09166	0.688771	0.398564	1.58001	3.46669	6.70264	1.55661	0.124717	0.276728	3.16049	1.09018
alive	2639	0.595437	1.60139	0.781421	3.4181	0.451462	0.860001	2.77318	5.74685	0.84872	0.174619	4.06968	4.78881	0.751669
dead	361	0.434145	0.523013	1.38562	0.532128	0.0844662	0.933195	2.18236	4.70002	0.535309	0	3.65914	1.66029	1.59281
dead	841	0.855993	0.020941	0.531305	0.216185	0.0253897	1.7811	1.35275	4.93316	0.220774	0	7.56791	1.12777	0.185253
alive	1888	-0.0126883	1.62226	1.29947	0.291424	0.177751	0.038812	2.7792	2.32263	0.384377	0.182537	0.550388	3.03528	0.707015
dead	3453	0.547446	0.0142645	0.182032	0.0771488	0.0258778	0.98082	1.56407	2.56652	0.224739	0	7.51081	3.60783	0.0868888
alive	1280	0.382735	0.436003	0.816897	0.777938	0.0211598	1.11882	3.55162	3.24039	0.270721	0	5.28828	3.48882	0.105698
dead	368	1.12624	5.38104	4.46632	1.4078	3.10005	0.229741	2.88959	5.01523	0.568703	1.99587	7.42001	5.03193	1.76648
alive	5219	-0.00511678	1.12051	0.454566	0.211836	0.0681005	0.138184	3.42447	1.35225	1.12546	0.136772	4.22268	2.52483	0.087014
dead	2022	0.255282	3.06004	3.38317	0.875326	0.279979	0.00657558	5.62	4.70556	0.106645	0.0946277	1.65002	5.32034	0.672048
alive	2010	0.103336	1.00238	0.457379	0.116108	0.172729	0.0882897	3.7338	4.32915	1.04256	0	4.48927	6.30274	0.351087
alive	1812	0.283682	3.0299	3.08184	0.659946	0.148994	0.282063	2.78581	2.97842	0.616644	0	2.04794	4.22838	1.02226
alive	3976	0.50413	2.44121	1.70197	1.72297	0.523442	0.375704	3.72183	7.66499	1.38629	0.18374	5.88378	5.67695	3.42261
dead	1766	0.329682	0.200523	2.08319	0.249643	0.0108439	1.20502	2.73797	3.69235	0.0979723	0	2.14438	1.78187	1.28463
alive	1429	0.00274981	0.202958	2.06112	0	1.68889	0.434874	3.5391	5.46188	0.890793	0	0.752273	5.57339	3.33951
alive	1409	0.450813	6.52426	5.05785	3.19565	2.41876	0.132532	5.9712	4.94169	1.88485	2.44413	2.10426	7.10588	1.25612
alive	5065	-0.226244	2.23618	0.675379	0.343794	0.0420189	0.0636004	3.61586	1.90838	0.4266	0	1.85658	3.44839	2.8922
alive	2644	0.812311	6.89019	3.58932	4.10233	1.61135	2.48745	3.7834	4.24076	3.2204	5.46886	7.25623	4.71381	1.61214
dead	1832	0.650306	2.32277	2.06495	0.657223	2.04914	0.321842	2.21606	4.67322	0.104273	2.56091	3.20897	2.96088	1.05416
dead	746	-0.074528	1.18739	0.777302	0.181402	0.247286	0.373733	4.05761	2.07181	1.11164	0.227694	4.48282	4.22966	1.68208
dead	422	0.22582	0.0695638	0.649192	0.0195662	0.00862836	0.551616	0.454822	1.18405	0	0	1.47591	0.590547	0
dead	284	0.697742	0.179581	1.17364	0.0519147	0	2.3535	2.35113	7.1972	0.104279	0	3.58637	2.61973	0
alive	3151	0.0728145	0.365388	0.622796	0.623508	0.0179219	0.0539817	3.97321	2.96864	0.81289	0	4.29938	5.30115	0.292883
alive	1209	0.454445	0.422803	0.620764	0.0878039	0.0197499	1.26463	2.19655	5.3542	0.87534	0.0795867	4.5377	2.39552	0.360262
alive	1378	0.389639	0.0155543	1.31348	0.124179	0.259957	1.98948	2.34091	4.59054	0.795402	0	3.02895	2.97168	0.0480414
alive	5318	0.481747	0.170984	0.278422	3.09023	1.14102	0.504831	2.19651	3.12864	0.962508	0	4.59633	3.97571	0
alive	1695	0.100992	0.0376814	1.4216	0.114087	0.445208	0.646899	4.74912	6.11268	1.82535	0	3.72279	5.51618	0.767768
alive	1714	-0.0359245	0.665848	0.802536	0.319245	0	0.0845278	5.04364	3.30734	1.07417	0	3.70269	3.82846	0.267312
alive	4414	-0.0886098	0.329028	0.11992	0.0127131	0.0332716	0.125077	3.67485	3.76489	0.283669	0.17376	0.814044	3.48784	0.356221
alive	1002	0.602594	0.0212288	0.724234	0.934835	0.112369	0.0974441	1.62537	2.94659	0.504997	0	6.64804	2.33558	0
alive	688	-0.608341	0.0574934	0.921547	0.0134478	0.0807907	0.00656813	4.8665	2.68849	1.20338	0	1.05147	4.31936	5.31539
alive	1941	0.684307	0.0485168	0.490592	0.278231	0	0.787008	1.43861	9.11566	1.17447	0.118284	3.5219	1.45995	0.279376
alive	818	0.405116	0.0238355	0.990151	0.298934	0.301744	0.831608	2.33967	2.38542	1.27085	0	7.02997	3.26301	0.209282
alive	3826	0.364717	0.32003	0.575493	0.0539986	1.45548	0.599962	1.44639	2.97032	0.209198	0	6.47084	2.6816	4.36228
alive	4129	0.0916536	0	0.247896	0.205586	0.0477358	1.46787	2.57658	5.02521	0.606161	0	0.74306	3.35323	0.547495
alive	4195	-0.287094	0.0372409	0.151335	0.0258369	0.0114075	0.0314118	2.87482	2.53492	1.78235	0	5.65184	4.71836	5.46366
alive	5424	-0.0736959	0.254084	0.217725	0.190798	0.121273	0.440031	4.22951	3.64994	0.627137	0	2.36929	3.68505	0.839597
alive	553	0.178833	0	0.873892	0.159508	0	0.799516	2.09398	2.50606	0.120311	0	1.73498	1.63213	0.418237
alive	487	0.665318	1.17934	1.74735	0.15043	0.126924	0.153413	0.58222	3.55169	0.174375	0.422832	3.97067	0.719146	0.130439
alive	3808	0.600883	0.138223	0	0.154336	0	1.74361	1.8918	2.64324	0.099057	0	7.69351	1.22686	0.350301
dead	938	0.0994847	0.405848	0.394027	1.93198	0.0867723	0.0574554	3.15723	5.47912	0.608691	0.245506	3.29231	4.86963	4.58101
dead	2421	-0.10924	0.151905	0.248347	0.0312859	0.170183	0.45262	2.28323	1.54529	0.702999	0	1.42292	2.76978	0.481706
alive	718	-0.0161956	1.09144	0.266528	0.146086	0	0.564471	4.46968	2.94214	0.746947	0.118508	3.6786	3.9103	0.0752215
alive	804	0.663404	0.0754398	5.08348	0.402176	0.0155897	0.100709	3.1426	6.19501	0.265887	0	0.828546	2.94827	0.533234
dead	1780	0.673014	0.0315814	0.866886	0.146729	0	0.237376	1.4848	4.46405	0	0.151316	6.96746	2.1979	1.6836
alive	7342	0.292349	0.621519	1.01586	0.0514474	0	0.647135	3.63388	3.18538	0.455599	0	6.48014	7.13643	0.364224
alive	5177	0.806223	0	0.397011	0	0.0136038	1.723	0.475315	3.88359	0.234469	0	6.96986	0.262695	0
dead	2711	0.61886	0	0.139904	0.0394615	0.0347291	0.750465	0.586663	2.4287	0	0	6.63065	0.329764	0.524794
dead	3259	0.354651	0.483354	0.26243	0.139942	0.0128543	2.50091	2.64453	1.53504	0.502605	0	7.29567	4.45147	0.243888
alive	4897	0.354158	0.319068	0.31768	0.0429031	0.025285	0.21024	2.31029	3.65415	0.219922	0.101314	5.28023	5.52082	0
alive	4646	0.628346	0	0.0921121	0.0940001	0.016968	0.939997	0.630596	3.07909	0.412033	0	7.54326	1.80487	0.791111
dead	884	0.524593	0.0227739	0.182168	0	0.0412168	1.93684	1.31738	8.81807	0.124293	0	0.738122	4.51891	0
dead	3564	0.106029	0.0715131	0.826804	0	0	0.072219	2.95939	2.03789	0	0.117213	3.98246	7.87792	0
dead	5101	0.610754	0	1.86388	0.101791	0	0.702933	1.4738	4.00133	0	0	4.83266	2.95795	1.02339
alive	4609	0.350191	1.3154	1.25462	0.843179	0.1416	1.16222	2.25677	0.9528	0.0792916	0.535353	4.60359	1.86508	0.999082
alive	1663	0.509407	1.76768	1.26366	0.331939	0.0773851	0.589012	2.70759	3.31346	0.823604	0	6.98307	3.03768	0.437628
alive	111	0.47677	3.67257	1.0918	1.14608	0.768363	1.57452	3.7192	3.28691	0.744433	0.728025	6.47436	4.88174	0.2914
dead	216	0.280476	0.604376	0.811067	0.0485762	0.0321933	1.94917	2.40563	1.92737	0	0	4.03404	4.2775	0
alive	551	0.61413	1.76812	1.86151	0.351213	0.139546	1.96926	0.851546	3.46477	0.101327	1.06551	6.32643	2.68585	4.20189
dead	468	0.127121	0	0.260231	0.0329038	0.112469	0.850957	3.31828	3.32016	0	0	2.32795	2.71253	0.0733278
alive	678	0.16919	0.185951	0.422388	0.36198	0.0634681	1.39022	3.34526	3.12451	0.564344	0	4.2598	2.34006	1.27583
dead	519	0.536026	0.357911	0.0671359	0.0818468	0.0603784	0.806505	2.4095	7.80644	0.308982	0	3.89394	1.60511	1.2408
dead	190	0.271323	0.710134	1.87954	0.200696	0.0516185	0.935902	5.00934	4.95252	0.492744	0.378256	4.78966	2.64914	2.39861
alive	505	0.341655	0.0340859	0.165223	0.0118685	0	0.245068	4.48378	3.88811	0	0	5.58283	0.205393	0.103909
alive	218	0.732067	0.129021	2.77734	1.14192	0.0270598	1.05396	1.95445	3.43225	0.526915	0	5.47658	3.72682	0
dead	561	0.95267	0	0.861053	1.13913	0.0379234	1.73503	0.587672	4.01585	0.319696	0	8.06764	2.47359	0.0644382
alive	301	0.301497	0.0893161	0.203219	0.0984374	0.0656163	0.596263	2.90851	4.51281	0.444825	0.0892556	4.97068	5.01502	0.44265
alive	766	0.186427	0	0.0382537	0.0157482	0.132819	0.104163	0.994942	2.9893	0.124083	0	1.49855	1.53474	0.319698
alive	2359	0.192969	0.0199907	0.305737	0.0811371	0.297172	0.0982451	5.57501	3.85271	0.479753	0	5.70902	1.67923	0.0615482
dead	698	0.854887	1.81121	1.20733	0.359119	0.207108	0.133267	1.1437	4.22042	0	0.151167	8.47007	2.21149	1.74335
alive	2329	0.213172	5.7661	4.19999	2.46774	1.71053	0.454624	4.96104	2.70465	2.02508	1.94692	1.7901	6.50831	0.576217
alive	820	0.667251	0.315009	0.25995	1.69099	0.35275	1.79281	2.08754	4.809	0	0	5.10097	3.75898	0.136748
alive	4407	-0.250155	0.252446	0.759777	0.0880398	0.571948	0.0858606	2.60094	5.07869	0.907175	0	0.286118	2.26522	5.98074
dead	620	0.386084	0.269699	1.68466	0.123949	0.0188298	0.512178	2.31924	2.50732	0.385034	0	5.01096	3.56644	0.654905
alive	6768	0.32902	0.227051	0.594689	0.148895	0.0673109	1.78846	2.84572	5.19193	0.671847	0	3.96433	3.79921	0.796748
dead	5370	0.293388	0.0448207	0.0991982	0.416138	0.0453471	1.48315	1.48976	2.15296	0.920054	0	4.8142	2.06562	0.135626
dead	1093	-0.13426	0.21033	0.597748	0.167256	0.0715213	0.338265	3.74028	4.69285	2.2768	0.0735202	3.59667	4.96863	1.73147
alive	4107	0.0454043	2.36084	1.72651	0.75193	0.644373	0.193893	4.18056	5.18955	2.02289	0.392183	4.39144	5.65888	3.18661
alive	2703	0.47358	0.999296	1.2365	0.889313	0.450945	2.26048	1.677	5.02756	0.188387	0.0862744	0.783704	2.12687	0.0545386
dead	1640	0.011392	0.886109	1.14297	0.0758543	0.17472	0.149227	4.49571	5.10066	0.463264	0.0782855	0.42005	3.67902	0.143505
dead	2005	0.718499	1.14327	1.65458	0.203988	0.272118	2.95815	1.10103	5.28255	0.351839	0.0854362	5.11088	2.04461	2.16055
alive	825	0.357907	6.89041	5.39732	3.49163	2.54758	0.884918	6.7455	4.38068	1.82428	2.78261	4.9112	7.58568	5.92828
dead	2071	0.334043	7.27119	4.65774	4.48712	2.83339	4.34437	4.42892	5.08314	4.41947	7.95863	3.36743	6.97398	5.92884
dead	1032	-0.0267497	0.195907	0.0631406	0.173661	0	0.0127889	4.14217	6.47762	0.291965	0	0.466981	3.12571	1.57653
dead	319	0.64579	0.050719	0.55	3.0202	1.43003	0.278393	1.48007	3.93861	0	0	2.43952	1.55269	0.052773
dead	6873	-0.0864566	0.159826	0.458767	0.0758348	0.31615	0.87401	2.97013	3.54422	0.372321	0	0.0128676	5.73043	0.0575007
alive	1319	0.170041	2.25353	2.12283	0.587418	0.0843533	0.585801	3.92192	3.01686	0	2.14192	1.33158	5.72007	0.186096
alive	2193	0.395599	0.166755	0.215651	0.0663169	0.375825	0.334904	1.56448	3.81977	0.206612	0	3.88411	2.32419	0.173235
alive	1136	0.34792	0	0.308037	0.0277838	0	1.11145	1.88082	2.45983	0.110444	0	4.42691	1.3223	0.337648
alive	2249	-0.428745	0.0464221	0.472229	0.0637712	0.0142513	1.01326	7.35254	3.35761	0.873514	0	0.705035	2.76337	0.328112
dead	430	0.493918	0	0.286605	0.543808	0.02258	0.0738029	0.686271	1.4981	0	0.0907268	5.55542	1.50026	0.165732
alive	396	0.290375	0	0.105506	0.0655544	0	0.2217	1.8733	2.14152	0	0	3.8352	0.739578	0
alive	804	0.684415	0	0.211477	0.0507812	0	0.0348335	0.133877	2.75379	0	0	6.47734	0.389193	0.0459869
alive	1039	1.57078	11.1701	11.2712	7.4984	3.48868	4.32956	6.3324	7.2243	4.68391	9.34356	5.86759	10.0949	2.5687
alive	632	1.68186	9.8827	9.8645	6.54171	3.49916	6.48651	6.66727	6.95632	4.00099	9.42071	7.32806	9.66633	0.721027
alive	645	1.02358	6.93736	8.03131	2.88835	0.181388	2.35363	4.65015	5.2503	2.19064	4.94336	4.16138	7.76117	0.219231
alive	378	1.71501	12.5513	12.7266	9.19068	6.7116	7.2158	10.2686	9.93135	6.9911	12.1171	7.49246	13.0581	2.67116
alive	39	1.65252	11.4145	11.2135	8.29011	4.04139	8.28372	8.39847	9.38229	6.41736	11.7077	6.41863	11.0819	0.999409
alive	796	0.870085	6.1352	6.58831	2.2977	0.876372	0.0977533	3.25302	4.4104	0.72605	0.366228	6.00156	7.26805	4.46135
alive	650	1.0212	10.4557	8.50604	6.9338	4.56063	5.96799	7.26307	8.44388	6.39689	9.46226	5.21229	11.3378	2.90553
alive	1160	1.37968	12.6742	11.9777	9.30691	8.09753	9.44472	9.99437	10.753	9.27752	12.7113	7.0151	10.5573	5.8938
alive	180	1.13747	11.0826	10.9094	7.13205	4.42504	6.40772	8.84813	8.98717	7.18392	11.131	6.17893	11.8688	3.62164
alive	278	1.68113	11.2936	11.3981	6.70164	2.70649	1.50893	7.36889	7.40395	3.12938	4.60496	7.96536	11.1458	1.42837
alive	126	1.17868	6.87781	7.4627	3.00866	0.881658	1.86535	4.62153	6.61118	1.85421	5.99041	5.35342	8.58983	0.945736
dead	326	1.39564	7.25466	8.37203	4.28006	1.6801	0.460321	3.14117	4.94793	1.21283	2.94121	4.50874	7.80157	0.298544
alive	262	1.42651	8.10438	8.23507	2.7331	2.37716	0.0757595	3.86939	5.57505	1.26514	2.74858	7.67273	7.7628	1.62096
alive	291	0.869595	0.61177	2.36034	0.106196	0.228377	0.750483	1.32041	5.05537	0.187649	0.243796	5.34864	1.27191	0.205974
dead	721	1.23032	2.59419	3.99424	0.182085	0.0685587	0.950896	1.46154	5.67361	0.332296	0.0802697	8.95128	2.99752	1.14808
alive	441	0.414143	0.140126	1.49646	0.687851	0.229011	1.04058	1.252	5.4117	0.253707	0	1.7633	1.32132	2.91639
alive	568	0.556719	2.19405	1.83589	0.613068	0.753276	2.31839	1.46727	3.11405	0.464763	2.05552	4.00898	4.45887	0.704774
dead	205	1.32209	11.7324	11.2651	8.83437	5.86937	8.96351	9.71701	9.5025	7.93776	12.2903	6.9204	12.5062	4.07269
alive	81	1.35152	9.44298	7.99872	4.72251	2.88217	1.33534	5.09753	5.78678	2.036	7.38963	4.96568	8.3708	0.362338
alive	741	1.17287	7.19829	8.21689	2.46522	0.352079	0.100103	3.29354	4.99879	0.487721	4.20835	3.34964	7.16622	1.0472
alive	422	0.322192	0.561866	0.130633	1.28235	0.0122159	0.552721	3.26017	1.85719	0.307534	0	5.69431	2.03812	0.0617741
dead	315	1.17206	0.100131	0.706871	0.778358	0.0495048	2.74654	1.85046	9.9342	0	0.100064	5.9436	0.316498	0.394303
dead	636	1.85272	12.5913	13.3411	9.18121	4.77581	5.94362	9.32218	9.24284	6.47474	10.4559	8.33211	12.294	2.01125
alive	774	0.849718	4.27406	4.00875	3.38939	2.04869	0.994061	3.69364	5.44342	1.42969	4.41481	3.96934	4.55936	1.54121
alive	977	1.37372	3.01228	3.22247	4.28494	0.104876	0.809555	1.67801	6.4058	0.816217	3.08709	7.2906	4.08606	0.21616
alive	620	1.57344	12.1539	12.4004	7.53003	6.11809	4.83462	7.81611	9.80557	7.53274	11.7463	6.65547	13.0658	1.9306
dead	326	0.827882	0.159346	0.480401	0.931962	0.037859	0.26486	1.52151	6.50587	0	0	6.26161	2.12535	0.935067
alive	777	1.27251	11.0642	10.2172	8.16502	4.75459	7.41353	8.48683	8.41725	7.017	11.2287	6.05158	10.9953	2.47316
alive	931	1.20155	8.14129	8.50571	4.29284	1.33642	1.77378	5.63561	5.26241	3.09012	6.74486	6.73264	8.66631	0.448881
dead	264	2.01685	12.9859	13.361	9.60872	6.24116	7.35523	10.6675	10.9145	6.2242	11.0329	7.56756	13.842	0.788763
alive	590	0.148458	1.62681	1.89879	0.292394	0.0642679	0.203609	2.47859	3.03933	0.190835	0.321836	0.533604	4.26647	0.257382
alive	226	0.652491	3.06046	2.8351	0.942644	2.21656	0.0868569	1.71431	3.61091	0.322065	2.70598	2.2858	3.81596	0.243939
dead	472	1.63729	11.1054	12.2157	8.04702	2.81076	1.06053	7.62221	7.21032	3.64256	7.48441	7.49448	9.47504	4.1627
dead	454	1.1767	9.88847	10.5485	5.59748	1.67771	3.41163	7.37062	6.33179	3.35149	7.74377	4.99576	10.259	2.73092
dead	619	0.899628	0.725765	1.60586	0.0826045	0.012396	1.09366	1.04704	3.04694	0	0.360704	7.99578	1.22281	0.122729
dead	401	1.14363	9.30643	9.34486	5.69788	2.76757	1.38184	5.54208	6.67157	5.25431	5.63463	5.45736	8.30541	0.788098
dead	369	1.79806	12.6322	14.4392	9.83235	4.83865	7.6386	10.3171	9.45845	7.42328	13.2881	7.06005	12.0959	2.38843
alive	2076	-0.00530825	0.0526257	0.143721	0.18513	0.0215332	0.132119	3.5702	2.60252	0.506055	0	3.77874	6.20357	0.0547555
alive	1643	0.952476	0.126502	0.062532	0.0386341	0	1.56209	1.04549	5.24731	0	0	8.62923	0.35533	0.363194
alive	891	0.360713	0.298026	0.302074	0.397397	0.0493934	0.59816	2.10419	2.83449	0.332864	0	5.42339	2.65224	0.779699
alive	779	0.534002	6.30128	4.93392	2.32846	3.72952	1.04357	3.40624	5.10172	3.65591	6.10341	2.98451	7.75257	1.5496
alive	1792	0.293408	1.698	2.67388	0.364693	2.6733	0.400881	1.17286	1.75613	0.224175	0.531685	4.74699	6.90882	5.59991
dead	321	1.04965	9.78872	9.51764	7.14852	2.16591	6.87208	9.1851	7.67458	5.22088	9.63289	4.28653	10.967	1.11509
alive	214	-0.200451	1.73048	0.801433	0.768877	0	0.161275	5.44279	2.42919	0.261394	0.767273	3.33145	4.39794	3.32948
alive	1109	0.379113	1.97881	0.562876	0.460405	0.0262335	0.930308	3.05418	4.28934	0.65047	0.323866	5.41286	2.72912	1.00505
alive	382	1.55084	11.5955	11.0836	8.20717	5.08505	7.40833	9.05484	8.60946	5.73944	9.86222	6.4835	12.0765	1.63133
dead	352	1.32183	7.26133	7.54271	3.31316	1.65209	1.67349	2.75251	5.34705	0.487876	4.0569	5.28484	5.48664	4.15773
dead	608	0.829886	3.77248	3.30881	1.08961	0.173641	1.35389	2.7662	3.13045	0.920989	2.00937	8.05954	4.84542	0.656063
alive	390	0.950755	1.99825	2.50717	0.346008	0.413545	0.310475	2.00342	7.83322	0.417976	1.38041	6.15769	4.84995	1.2244
alive	17	1.6645	9.59993	9.95775	5.5398	0.32547	0.945812	6.43507	6.63177	1.27155	6.06919	7.24597	9.20468	0.502478
alive	362	0.623892	1.09914	1.47706	0.120009	0.0853848	0.155899	2.07642	6.48069	0.278515	0.0877595	4.09916	4.39799	0.160445
alive	360	0.541485	0.194985	0.287279	3.00001	0	1.28246	3.0967	4.05173	0.576272	0.100716	6.4501	6.99581	0.293983
alive	414	0.855745	0.0576862	0.24372	1.95086	0.0118625	2.03231	1.56335	4.03914	0.206384	0	7.48181	1.98507	0.117636
dead	907	0.573039	0.795662	0.275817	0.170146	0.00988274	0.851448	1.04383	1.72115	0.0895236	0	7.5663	3.56307	0
dead	828	0.808188	0.631603	2.14711	3.26223	0.353796	2.01222	1.39797	5.81676	0.373864	0.477234	1.52218	3.584	0.057766
dead	263	1.36692	5.92304	4.65281	3.84423	1.7283	3.1082	4.75793	5.59059	0.197954	2.1305	7.89818	6.59135	0.217211
dead	2889	0.791877	0.238817	0.512361	0.200735	0.0104747	1.62346	0.954516	3.6353	0.267357	0	8.01902	0.736086	0.744004
dead	1026	0.489296	0.917389	0.448346	0.396557	0.0802865	0.656075	2.66577	4.46043	0.936371	0.343821	6.58149	3.4361	0.05944
dead	447	1.85937	10.7169	9.94886	6.80862	2.67119	1.00169	5.32214	7.86888	2.95926	8.16727	6.65426	7.71583	0.240192
dead	2073	0.562102	1.84045	1.75865	0.741681	0.486732	1.60632	2.32624	1.97059	0.435702	0.087198	6.01968	3.00405	0.208902
dead	151	0.689305	5.53846	4.05375	2.27948	1.45569	1.33673	4.35149	2.98247	0.594983	1.81794	5.82065	6.10234	1.75215
alive	4070	0.316632	1.76077	2.53268	0.621556	0.0723548	1.21979	2.73697	5.17924	0.564632	1.51717	0.924362	3.46557	1.84525
alive	2785	0.154783	0.440456	1.20888	0.268346	0.312142	0.566437	3.71692	1.81046	0.65704	0.140043	5.16736	4.2125	0.766408
dead	5118	0.592084	5.26673	4.19257	2.16236	1.2368	2.85289	4.25115	5.23985	0.491024	1.81052	0.966467	5.90043	1.00565
dead	412	0.485843	0.27498	1.34091	0.0751333	0.0192322	2.80088	2.14409	3.57926	0.169909	0	6.73522	1.8641	4.05044
dead	1927	0.582902	0.0219357	1.83431	0.42093	0.39646	1.33445	1.03819	5.41704	0	0	1.40326	0.835422	1.19671
dead	2588	0.570873	0.0217309	0.387478	0	0.0132331	1.53907	2.12711	2.32962	0	0	7.66538	3.11111	0
dead	2402	0.623111	2.41199	2.21395	1.4841	0.221863	0.9176	2.02033	4.80014	0.288278	0.134506	5.04124	3.18483	3.23733
dead	425	0.801791	0.138812	0.206366	0.0494864	0.0175861	0.77175	0.733799	4.54985	0.0801289	0	7.40443	1.55535	0.250106
alive	1940	0.391851	0.0989798	0.287189	0.353986	0.211758	0.223275	0.916845	1.16794	0.0934657	0	5.82414	4.29894	0.151751
dead	2192	1.1277	12.6069	12.8632	9.57897	7.80139	7.14415	7.56571	9.2694	12.285	11.8553	6.25348	11.1754	4.32847
alive	1966	0.326433	4.10828	0.848656	1.29641	1.09785	0.370793	3.62209	2.41937	0.51777	0.93776	6.81509	5.35757	2.20949
dead	79	0.614928	3.73203	0.796251	0.983919	0.738314	2.75314	3.00577	1.57626	0	0.975899	7.71481	4.69612	0
alive	1729	0.515413	0.514166	0.0680387	3.31831	0.668351	2.01676	2.31346	1.78671	0.403625	0	6.95653	2.88627	2.46018
dead	566	0.00150046	1.24766	0.669061	0.16415	0.784481	0.663311	4.87513	2.58571	0.712002	0	5.97296	4.30241	2.84485
alive	1716	0.262961	0.297641	0.312983	0.0142069	0.01249	1.34654	3.33452	3.99775	0.404822	0	4.83834	4.40343	0.39302
dead	2030	0.37349	0.127649	0.378481	0.166753	0	1.94394	1.95152	5.21904	0.565149	0	3.66371	4.47557	0.56719
alive	440	0.314826	0.126224	1.02757	0.32508	0.0113964	1.05486	1.7344	5.9825	1.26507	0	3.52923	2.10028	2.8966
dead	1864	0.307679	0.153604	0.909988	0.279166	0.0364388	0.967269	2.29484	5.07518	0.562148	0.0978351	3.04083	2.29112	1.78933
alive	11252	0.0646438	0.185956	1.82517	0	0.0255939	0.437253	3.56974	3.89525	0.0780178	0	0.835543	4.37476	1.17537
dead	787	1.59197	9.47431	6.77139	5.61126	2.23058	2.08615	3.38755	6.18653	0.937005	5.84263	6.32628	7.74881	1.89626
dead	545	0.124783	1.10901	0.521013	0.134507	0.294372	1.41258	2.59053	2.92998	1.25168	0	6.18674	4.38227	3.02642
dead	1424	0.346738	0.881671	0.650883	0.596779	0.0578631	0.699633	3.60488	5.7529	0.251651	0	3.52882	4.26214	0.55946
alive	3527	0.429117	0.442392	0.382445	1.1601	0	1.56606	3.89777	3.94582	0.276653	0.0529092	6.95807	2.04469	2.2151
alive	1814	0.453575	1.02507	0.786756	0.167129	0.036175	0.735815	2.63905	1.91609	0.722762	0.0734625	8.59402	2.98439	1.03216
dead	1195	0.797257	0.0982042	0.542814	0.405458	0.0405589	1.16937	1.34561	7.97742	0	0	5.38923	1.96535	2.24507
alive	2620	0.463795	1.02066	0.653623	0.154083	0.332291	0.276475	2.45188	4.60306	0.773579	0.322809	6.19942	4.98761	0.304697
alive	1803	0.0769689	0.146575	0.261838	0.244576	0.116906	0.408888	1.87748	3.26235	0.164713	0	2.17338	1.49823	2.78923
alive	2051	0.228692	0.0935692	0.699087	0	0	1.59958	2.22206	1.80064	0	0	3.13273	2.71691	0
dead	10346	0.314795	2.64418	4.32374	0.701249	0.0264989	0.528116	3.03385	6.34997	0.707566	0	0.801142	6.94974	3.50636
alive	5286	0.141582	1.08062	0.971521	0.258519	0.0806261	1.88287	3.52216	6.70629	0.618534	0	0.978253	4.50872	1.79254
alive	6699	0.38898	0.387455	1.16759	1.64994	0.324371	0.563723	3.83528	5.65806	0.683443	0	3.74017	5.20736	0.626625
alive	1482	0.448662	0.392843	0.560432	0.2736	0.0647017	0.485143	2.72989	2.94401	0.631578	0	7.22371	3.4462	0.138994
dead	3266	0.307078	0.330199	0.214497	0.0267403	1.4726	0.161566	3.36584	1.21437	0.298228	0	7.4426	3.66941	0.465242
alive	1665	-0.0826673	3.66079	0.802056	0.619734	0.310548	0.0281907	5.97231	2.87684	0.870653	0	5.65709	4.35771	2.66781
alive	2423	0.14685	2.99891	0.95167	0.150855	0.0213372	0.0294982	4.05739	2.83351	0.636987	0	5.4105	4.66942	0.941015
alive	2296	0.778283	1.24641	1.55827	0.535641	0.0460959	2.41501	1.19002	2.71455	0.0709355	0.341625	6.46002	1.94552	0.256863
dead	3106	0.804725	0.326236	1.73963	0.759239	0.0329597	2.38655	1.45681	4.51913	0.363976	0.0886711	6.34686	2.2433	1.13021
alive	3857	0.230489	1.51549	2.36773	0.393216	2.80904	1.16621	1.41434	4.33275	4.18922	0	4.02669	3.53492	0.94156
dead	423	-0.000949662	1.28365	0.62859	0.592683	0.134861	0.855238	3.52836	5.87927	1.01007	0.237799	2.71775	5.09604	3.75394
dead	1301	1.12224	4.03512	3.2454	2.06576	0.239977	2.33793	0.776121	2.83937	0	0	6.24241	1.99717	0
dead	2470	0.575217	0.879136	1.77136	1.0603	0.020853	1.4	3.03493	3.9544	0.0946401	0	5.33876	2.22743	1.48425
alive	1365	0.489925	1.9684	0.545172	0.217302	0.0771521	0.181474	3.18411	2.50078	0.268615	0.124875	9.07388	2.18627	1.80202
alive	2884	0.305268	0.729991	0.182028	0.140141	0.0774583	0.306914	2.58621	3.52923	0.174315	0.0796186	3.87168	1.96601	0
dead	659	0.0934618	4.46594	1.36079	2.03819	2.6651	0.803537	4.16972	2.79458	0.304179	1.21006	0.394236	7.93575	0.428414
alive	3932	0.408764	1.09483	0.396986	0.164475	0.0745749	0.00605072	3.64059	3.65437	0.436079	0	7.41204	4.37184	0.159594
dead	877	0.443938	1.7062	1.02128	0.17558	0.0536721	1.75723	1.43699	3.93644	0.122015	0.10833	1.99888	0.67741	0.134225
dead	601	0.273814	0.729685	0.565984	0.225853	0	0.805303	4.08559	4.34261	0.663491	0	4.76542	2.12405	0.312566
dead	1871	0.479425	1.79031	1.18384	5.23608	1.05938	0.37916	3.28016	4.56135	0.915055	0	1.98315	6.96057	0.0689087
dead	1438	0.40466	0.249285	1.94602	0.342952	0.725474	0.113951	1.94263	2.40213	0.323041	0	3.68045	1.21749	1.16845
dead	3141	-0.0215141	0.851961	0.500248	0.660319	0.0152473	0.805941	4.49171	3.4553	0.99243	0	2.70401	3.35861	0.285281
dead	8174	0.204505	0.113604	1.45545	0.0571923	0.0503702	0.977781	1.9734	0.54267	0.0924557	0	3.08465	2.88587	0.0518034
dead	3139	0.28176	1.9298	0.533737	0.717533	0.0752662	0.633726	3.73653	4.3829	0.945853	0	5.51902	3.24705	1.17606
dead	516	0.383726	2.35693	2.40507	0.625772	0.077679	0.0382157	2.76619	2.14459	0	0.0798453	4.66773	3.81959	1.78857
dead	6225	-0.0151573	0.627436	1.80176	0.0496614	0.26305	0.793916	3.81051	4.54812	1.83968	0.325647	1.4425	5.04916	0.0559982
dead	2927	0.51728	1.84729	0.842392	4.8578	0.458441	2.35916	3.79213	2.43017	0.203476	0	4.27103	3.65528	1.22574
alive	5487	0.186645	1.99013	2.00225	0.243206	0.0570458	1.42693	3.44834	3.69909	0.808421	0	1.89546	4.21504	0
dead	6590	0.452444	2.2928	1.79962	0.523724	0.241414	1.62911	3.83651	3.06153	0	0.115402	6.96887	3.6624	2.81544
dead	5107	0.118788	0.681504	0.530203	0.357487	0.121237	0.417811	1.66664	1.72454	0.103299	0	1.39297	2.28219	0.0579743
dead	1446	0.317654	1.07016	0.281445	0.0676303	0.0595887	0.0112023	2.34735	1.74355	0.607535	0	6.28334	1.95023	0
alive	7563	0.293546	1.91574	2.33827	0.536141	0.193839	0.813611	2.89676	1.64053	0.152651	0	3.21513	3.79532	0.517604
dead	1315	0.598017	0.461645	0.237117	0.49214	0.0645977	0.0922447	2.08869	3.96315	0.227248	0	7.38987	1.45292	1.15388
alive	4088	0.103276	0.864859	1.39395	0.168808	1.2408	1.57674	3.97452	4.59867	1.99086	0.174044	2.3868	2.32079	0.263512
alive	4942	0.679206	1.6691	0.998169	0.649396	0.190965	1.25959	2.03073	5.84002	0	0.0956009	4.62073	4.00835	0.329971
alive	2166	0.448354	1.28278	1.5582	0.762538	1.16543	1.48961	1.52139	3.94283	0.123073	0	1.60297	2.59432	0.952078
alive	1620	0.0213366	1.49144	0.503805	0.634876	0.10912	0.860753	3.7902	4.52275	1.22063	0.082403	3.26773	4.61704	1.62978
alive	3781	0.32542	4.82286	3.35585	1.8064	0.984977	0.65007	4.40379	2.88148	0.910038	1.50832	2.21763	5.38509	0.241358
alive	3733	0.0876285	1.49289	1.98074	2.66199	0.76985	0.417953	5.22776	4.46586	0.496138	0	0.185709	6.72653	0.64783
alive	1948	0.292421	3.00697	0.777764	0.638906	0.574851	1.37058	3.72702	2.66516	1.15721	0.713201	6.31413	4.71888	0.163408
dead	875	0.794391	5.44926	4.03939	2.53302	1.64124	2.87011	4.21264	3.61536	0.532979	1.724	6.94325	5.96662	3.52259
dead	420	0.369464	0.571816	0.615831	0.0696039	0.0732923	0.132691	2.74934	4.32438	1.09258	0	6.21594	3.94523	0.342694
dead	1265	0.466175	1.79846	2.96554	1.96449	0.172703	0.516996	2.20197	6.06248	1.54012	0.231947	3.14673	3.327	3.59961
dead	4222	0.260576	1.21813	0.454782	0.295197	0.112734	1.34752	1.39822	2.33228	0	0.165568	2.57695	3.17751	0.383063
dead	5237	0.334327	0.636947	0.817973	2.52466	0.126007	0.53768	2.48301	5.80032	1.32419	0	3.0679	2.4172	2.69828
dead	3869	0.230824	0.261323	0.0785975	0.0645257	0.028703	0.281485	1.49967	2.57294	0.391681	0	3.93379	2.34904	0.665247
dead	1124	0.210007	0.808881	0.452788	0.124801	0.0561605	0.496632	2.78508	2.16553	0.317846	0	4.57599	2.58994	0.494107
alive	1949	0.256095	0.0459225	0.0260762	0.0733408	0.0372883	0.33913	1.12403	4.18291	0	0	1.26002	1.27851	0.557266
dead	1044	-0.103033	0.148895	0.385759	0.10451	0	0	5.85756	3.90677	2.02643	0	4.73558	0	0.647102
dead	1618	0.32354	0.240402	0.316612	0.511991	0	0.813153	3.348	3.11117	0	0	4.10422	0.947336	0
alive	6138	-0.24822	0.269691	0.498703	0.110895	0.266399	0.99318	3.81268	4.83133	2.04397	0	1.8083	5.33266	1.989
dead	832	0.132747	1.42486	2.7128	0.161442	0.429512	0.767172	4.57071	1.92054	0.215973	0	2.68805	5.14893	0.236843
alive	1562	0.060027	0.731217	0.123441	0.448781	0.0229429	0.225154	4.29054	5.13753	0.376948	0	4.21219	3.20519	3.33225
alive	4086	-0.00303448	1.43293	1.64532	0.313565	0.229001	0.694367	3.79285	3.11269	0.253696	0.359664	2.21009	3.39577	3.25273
dead	4648	0.156013	0.0341168	0.139088	0.18974	0.0208103	0.0230632	2.02396	2.479	0	0	1.79171	0.689357	0.0529376
dead	955	0.671003	1.24374	0.606569	5.15005	0.0475306	1.31812	2.91706	3.48022	0.391716	0.0774171	5.27889	3.905	1.07236
dead	1354	0.695045	1.54947	2.21804	0.602055	0.0155458	0.375619	2.47144	3.78769	0.381509	0.440016	7.16659	4.18323	0.898355
dead	1078	0.507434	3.78112	2.25488	1.32461	0.707501	1.08689	3.80252	5.02518	0.103831	0.611161	4.74875	5.01362	2.84465
alive	1785	1.81465	13.0733	13.7083	9.61874	2.80551	3.18457	9.36342	8.86584	5.55442	7.79193	8.84208	12.122	2.78168
dead	424	1.06442	6.23368	4.69138	3.37362	2.09487	1.48862	5.39433	7.57311	1.16958	2.26384	5.52268	8.32403	0.157088
dead	1544	0.448088	0.170764	0.553527	0.0613138	0.573635	0.301819	2.61031	1.92395	0.278776	0	7.39401	2.32788	0.51779
dead	279	0.175018	1.64283	0.541244	0.258551	0.18415	0.0914429	2.90605	2.61658	0.326081	0.103925	3.90324	4.162	0.30274
alive	2365	0.721226	9.5457	6.43524	6.91376	6.00548	6.74368	6.23956	7.49185	5.82604	9.40285	3.24349	8.29204	5.84851
dead	2993	0.425251	1.60198	1.6998	1.76887	0.195856	0.235601	4.80286	6.26881	0.0945215	0	3.34427	2.97188	1.98364
dead	1487	0.688561	2.79955	1.91551	2.81146	1.07471	1.59379	2.34429	2.11215	0.16599	0.671361	6.58739	3.76103	2.61334
dead	383	0.799509	2.95603	1.79228	1.14084	0.773593	2.39218	3.16679	8.80663	0.775388	0.238369	3.95439	4.49528	0.535333
dead	396	0.837781	5.75617	4.71248	2.5648	1.50492	1.28596	4.61981	5.73891	0.334222	2.02549	2.5703	6.32789	0.194099
dead	802	0.52269	0.945201	0.454243	2.02492	0.0146643	1.10441	2.0182	2.32334	0.465298	0	5.96861	1.78275	0.75129
alive	9188	-0.024986	0.841767	0.423486	0.083688	0	0.0413838	3.57251	2.72691	1.15174	0	4.89437	5.20995	1.23258
dead	4634	0.454733	1.08515	0.694872	0.40986	0.0212012	0.097318	1.74967	4.73032	0.0961798	0.0853073	4.10314	1.46907	1.81288
dead	196	0.918208	5.4538	3.9904	2.36223	1.17224	1.83723	4.45789	5.28906	0.490984	1.58783	6.20111	6.11031	1.17255
dead	469	1.0791	8.99344	8.2868	6.47496	4.69754	6.90567	6.85836	7.85867	6.71606	9.49172	4.99033	9.17692	1.14583
dead	4000	0.373898	1.80641	1.81971	0.364759	0.357084	0.788089	0.973744	2.38158	0.231889	0	2.01633	2.7908	0.41914
dead	1857	0.0480441	0.0999029	0.594039	0.136317	0.0493899	0.817948	3.36167	3.40925	0.790625	0.0998355	3.97958	4.52131	1.7157
dead	1341	0.330463	5.74273	4.24607	2.55948	1.62057	0.244655	5.38397	3.89334	1.46302	2.12545	2.69149	6.66243	1.8301
dead	4930	-0.0591554	1.33145	0.487568	0.435027	0.0677776	0.993336	4.33198	3.4334	1.34254	0.154579	2.98212	2.92886	0.741322
dead	1548	0.0293549	0.68654	1.03568	0.522785	0.132155	0.664653	3.32136	3.54847	0.71209	0	5.65626	5.20817	5.43171
alive	1505	0.0188284	0.239575	0.297727	0.0873483	0.0486198	1.18251	2.85033	2.91912	0.252819	0	1.8399	5.19365	0.145095
dead	270	1.62932	6.05934	6.55741	5.17734	0.0563241	0.95893	3.2567	6.01871	1.07889	4.55612	7.17712	4.04672	0
dead	270	0.125756	0	0.527353	0.0804561	0	1.26378	2.56789	2.06766	0.619523	0	3.19797	1.6201	0.374389
dead	4507	0.198114	0.926334	0.0726387	0.907156	0	1.56204	4.80258	3.71021	0.229716	0	5.48142	5.65594	0.608249
alive	3196	-0.115619	1.76005	0.412895	0.183135	0.0106832	0.571794	4.68054	3.46342	0.698671	0.0856485	4.08601	4.51292	2.76003
dead	857	1.86157	13.4099	14.5859	9.40639	3.87185	4.72343	10.2959	10.2283	6.7732	10.4297	8.16477	13.5752	1.64583
dead	1333	0.585871	0.1176	3.04541	0.0417255	0.107484	1.29211	4.07767	9.89999	1.33389	0.277596	1.65227	3.9648	0
dead	710	0.563828	0.321578	1.90828	0.583493	0.331465	0.120602	1.88306	3.00006	0	0	4.72541	4.50717	0
dead	877	0.69116	6.66602	6.16953	3.71927	2.79032	2.7622	3.41756	5.2254	4.8079	6.45165	3.63578	5.09775	2.2979
dead	877	0.310996	0.102129	0.0747604	1.5311	1.46927	0.454694	1.26821	0.535831	0.0830557	0	3.12987	1.6739	0
dead	1490	0.156543	5.15735	3.61506	2.05678	2.39659	0.959019	4.62728	2.54783	1.69518	1.74939	1.63396	7.01865	1.22614
alive	1264	0.677453	5.44898	4.68591	2.31803	1.28173	1.81425	4.96328	4.0162	1.39269	1.49543	4.90533	6.78562	0.309729
dead	7514	0.539449	0	0.10314	0.240773	0.0190591	0.564975	0	2.88938	0	0	3.95998	0.247188	0
dead	2829	0.856448	1.00617	2.10632	0.101112	0.173225	0.924868	3.12939	7.78017	0.161977	0	5.82471	4.90906	0
dead	1429	1.03346	0.598815	3.15958	1.71347	0.309022	3.10289	1.62352	5.12471	1.6105	0	7.2731	2.99497	0
alive	1010	0.256924	0.0230159	2.31384	0.0780134	0.082135	0.953631	2.12701	2.60465	0.241076	0	3.44412	2.98724	2.97856
dead	426	0.872201	0	0.340667	0.109858	0.0371283	1.17797	0.887573	3.65072	0	0	8.7433	1.67727	0.0630991
dead	394	0.100182	0.106139	0.207876	0.171994	0.0525303	0.702404	2.21023	5.05702	0.963298	0	1.0139	2.25649	0.515268
alive	4533	-0.147338	0.0853617	0.311051	0.0497713	0	1.00407	3.7009	3.53892	0.0805852	0.0714322	1.53348	6.73464	1.75704
dead	368	0.667697	0.838434	1.16311	0.776828	0.0849564	1.9746	1.835	5.05223	0.323169	0	6.16495	3.93117	1.65525
alive	685	0.360048	0.0927522	0.238469	0	0.057023	0.701353	1.167	2.78812	0.808169	0	4.8642	1.13084	0.320667
alive	2828	0.00124354	0.202953	0.610757	0.160184	1.32296	0.571776	1.76148	1.21791	0.341335	0	2.66178	1.06178	3.57784
alive	5299	-0.0458945	0.113451	0.142486	0.050097	0.348462	0.339296	3.39157	4.7832	0.429725	0	2.92374	5.65756	3.02215
alive	478	0.725362	0.104315	0.251304	1.20687	0.0163277	2.30779	1.49395	5.90929	0.145358	0.12917	5.49421	2.01405	1.52298
dead	305	1.48965	6.88641	7.99485	3.56675	0.855491	1.59276	3.7865	7.59981	1.57254	1.61429	5.64086	6.86372	0
alive	583	0.114175	0.36578	0.466142	0.0267226	0.949211	0.764161	2.64884	3.89712	1.30968	0.0635842	3.33528	5.36882	0.190109
alive	6716	0.445321	1.31212	1.06559	1.63718	0.449463	1.14168	3.26746	3.23606	0.500977	0.197533	4.95822	4.05847	0.186
alive	847	0.777215	0.114654	0.823457	0.958378	0.0935085	1.2473	1.08438	4.71597	0.628257	0	6.35072	2.06215	0.0608268
alive	571	-1.15232	0.50211	0.66619	0.223799	0.372812	0.0496884	3.84725	5.29914	8.79837	0	0.441632	5.48332	1.16747
alive	1164	0.0918951	0.400202	0.73445	0.124825	0.0500373	0.907522	4.33735	6.0439	0.410006	0.101121	1.31627	4.92831	0.446933
dead	1059	0.10891	0.0250293	0.199163	0.340337	0.0152484	1.40593	1.62238	2.36884	0.13614	0	1.62469	4.58025	0.0767865
dead	1103	0.789738	2.46977	5.30823	0.605447	1.01302	1.42318	1.79543	3.41605	3.04392	0	7.07711	2.24197	0.952615
alive	3176	-0.0566628	1.50857	0.380849	0.816376	0.206143	0.624006	3.75634	3.51014	1.46841	0.10347	2.69818	2.20755	1.44358
dead	6598	0.0974767	2.52292	3.43205	0.455642	0.0764029	0.760167	4.76452	2.45939	0.464558	0.741004	1.20794	2.92453	1.26245
dead	1478	0.465275	0.67215	0.858826	0.163755	0.291184	1.56573	1.77856	4.11839	0.604765	0	5.43848	3.78559	1.24753
dead	6953	0.882356	1.28067	1.82539	0.3147	0.3261	0.770926	1.16848	5.79089	0.395005	0.354207	8.04769	1.65011	3.30347
dead	6164	0.556143	0.181752	0.874076	0.969902	0.0130083	1.57727	3.13549	4.64947	0.11684	0.200472	5.10734	2.88059	0.355687
dead	636	0.764099	0.0774924	0.128762	0.0854416	0.0844833	2.81833	0.949722	4.52116	0.169692	0	6.6885	0.646192	0.601339
dead	854	0.0374171	1.63232	0.60033	0.770072	0.108837	0.077661	3.38207	2.95887	0.339571	0.0821869	2.46941	3.48043	1.44494
dead	237	0.0585373	0.112171	0.629602	0.484486	0.0200945	1.14119	3.34128	5.47834	0.886826	0	2.90132	3.48552	3.43481
dead	843	0.453089	5.2053	3.76687	2.12441	1.17141	0.730809	4.39172	4.61289	0.334154	1.67257	1.00519	6.15882	0.952967
dead	1486	1.00286	10.1728	6.97031	7.25628	5.70911	4.96508	5.52512	6.87206	7.63713	8.91666	7.56715	6.26397	3.91119
dead	10870	0.325465	1.11103	0.805374	0.31975	0.17091	2.99458	1.32821	6.35254	1.35716	0.0962612	0.192281	1.61452	0.175572
dead	1628	0.5962	0.0489953	3.45087	0.0171175	0.0737305	2.27797	2.02771	5.76129	0.257422	0	0.307725	1.02266	0.462234
dead	1413	1.29552	6.34686	5.17131	3.41316	2.12024	2.16492	1.35811	5.12019	2.51446	3.30242	6.76961	0.492061	1.96404
dead	470	0.351373	0.431195	0.716244	0.177984	0.0633156	1.18875	1.10765	4.22262	0.162706	0	1.42522	1.43903	0.514667
dead	295	0.885351	0.150739	0.168922	1.61513	0.0318051	0.686908	0.65427	3.50608	0.0965332	0	9.15401	0.876067	1.90779
dead	996	0.591178	2.96887	2.29033	0.830461	0	2.19987	3.13589	7.94145	0.624807	0	2.8679	6.06038	1.1603
dead	1441	0.849015	1.74635	1.92098	0.87653	0.055291	2.42551	1.59047	2.35545	0	0	7.44672	3.14593	0
dead	728	0.939698	0.0650207	0.28033	1.06425	0.0496133	2.51863	0.51836	5.94632	0.176761	0	6.1717	1.12438	0.404912
alive	3080	0.956511	5.9236	4.40568	2.78886	1.78828	1.46905	5.06155	5.69603	0.550986	2.19569	5.5796	7.23056	0.562794
dead	730	1.47888	10.4955	11.5126	7.18787	2.53718	4.09292	7.9898	6.98679	4.39197	8.30861	6.12976	10.8722	1.17432
dead	2273	0.614377	0.374138	0.120496	0.521922	0	2.97552	2.62073	5.81116	0	0	5.64699	1.7955	1.51079
dead	4062	-0.0425273	0.758783	1.48297	1.11351	0.0881806	0.178933	1.64493	4.68413	5.62825	0.299276	4.3779	2.55381	0.324479
dead	347	1.12714	9.32979	8.72576	5.76555	4.46554	1.10476	2.7046	6.19194	6.29947	5.50673	4.57562	2.66214	3.24024
alive	4526	0.219064	0.68147	1.93448	0.5579	1.8147	0.761695	2.41174	4.3376	0.442961	0	0.608724	3.3436	2.31341
alive	1617	0.268148	0.835992	0.536281	0.756718	0.0458855	1.48369	2.48984	2.73536	1.32476	0.180112	5.42658	3.49512	0.45848
dead	808	1.37172	2.33423	3.03151	0.738915	0.208612	1.72696	0.812699	6.64275	0.111696	0.279032	8.21915	2.73297	0
alive	1505	-0.0265184	0.190923	0.131918	0.0553493	0.0245775	1.34957	2.75489	1.6313	0.111047	0	1.92037	4.2517	0
dead	824	0.863733	0.797279	0.38199	0.950327	0.0543592	2.65585	0.514336	3.62173	0	0.211628	6.66796	1.2863	0.0467355
dead	822	0.951483	5.6052	4.1306	2.46507	1.6464	1.38644	4.48044	2.77168	0.478116	1.67754	7.81556	6.32111	0.100777
alive	2367	0.970237	1.0713	0.564721	0.13468	1.11464	0	1.2492	3.94155	0.122961	1.01574	9.73021	0.343119	0.796756
dead	1525	0.236962	0.0446877	0.168881	0.520845	0.0716752	0.12204	2.09698	2.03903	1.08861	0	6.2184	3.66416	0.576629
dead	2028	0.589677	0.11017	0.393142	0.468697	0.0115389	1.03002	2.20067	5.37897	0.924083	0	6.6654	2.88289	0.411982
dead	874	0.852687	1.27467	1.35008	0.279266	0.571931	0.226002	1.14837	3.98852	0.473408	1.61307	7.63208	2.09495	0.280416
dead	5318	0.746881	2.85074	3.5064	3.67923	0.0324857	0.182322	3.41852	2.50667	0.190801	0.999634	6.25364	4.0556	2.5847
alive	1035	0.132458	0.102564	0.146449	0.111044	0	0.0844036	0.757853	2.09948	0	0.559077	0.591786	0.703719	0.298842
dead	813	0.81777	2.50588	3.51304	0.738536	0.0339498	1.28648	1.7174	3.98577	1.17421	0.985322	6.07834	2.37377	0.689322
dead	1655	0.593391	10.0062	4.22245	6.76776	6.19901	4.71127	4.83418	5.58735	5.63975	8.02415	2.43723	4.19953	3.66533
dead	2454	0.931591	0.0203897	0.194689	1.57385	0.0247223	1.85658	1.10892	6.77429	0.111682	0	5.74538	1.43313	0.39092
alive	531	1.23812	9.37394	8.15378	6.01305	5.45089	0.805108	7.97037	7.94522	2.63389	3.59563	4.16712	10.7214	0.102661
alive	1124	0.359089	0.341255	0.221973	0.0816586	0.0836469	0.322669	3.16844	4.60883	0.562217	0.275639	5.75289	2.42608	0.942111
dead	1691	0.724806	0	3.45964	0.412323	0.0193741	0.677892	1.14934	4.00276	1.53044	0	5.65256	3.82834	0
alive	411	0.200076	0.266432	0.768447	0.54154	0.808353	0.791394	1.9696	2.33232	0	0	2.01552	1.66147	1.48837
alive	640	0.240585	1.16577	1.68676	0.283553	0.0237432	0.139109	1.29418	3.29242	0.107384	0.184668	1.57293	1.36408	2.73
alive	587	0.12644	0.882398	0.078054	0.463066	0.101861	0.618039	3.4043	4.11846	0.389243	0	2.69283	2.59626	0.722564
alive	21	1.24181	8.79456	10.4514	5.90995	1.36438	4.58729	6.96874	6.31447	4.32067	7.94286	5.44228	9.81137	1.2461
alive	301	0.279765	0.16841	1.75148	0.85826	2.17579	2.13267	2.45678	3.97592	0.189078	0	0.0835934	4.90697	0.947305
alive	591	-0.256825	0.194508	0.180388	0.0130223	0.0340749	0.0315224	4.56575	2.39214	0.374949	0	1.89464	5.76717	0.5771
alive	62	0.115994	0.042069	1.26401	0.280594	0.0256885	1.09476	2.14482	2.54819	0.223203	0	0.953674	3.80763	0.353083
alive	480	0.362415	2.73374	4.08891	1.51024	1.59564	0.0252572	4.60432	4.18924	1.26837	4.51624	1.17858	3.2054	1.42193
dead	1070	0.0850973	0	0.535404	0.64903	0.523787	0.106558	1.55452	3.76911	0	0	0.916804	3.77978	2.71606
alive	4255	0.257964	0.299052	0.443286	0.0940209	0.0533226	0.896899	0.187093	1.58729	0.0705216	0	1.56128	0.68234	0.15146
dead	467	0.651724	3.78916	2.67013	0.878043	1.38231	0.0985007	3.68719	4.21406	0.337667	0	5.09441	4.13043	0
dead	3587	0.964354	1.60262	1.97655	0.776091	0.166263	0.927341	2.30175	4.25204	0.0990958	0.323426	9.0921	2.23311	1.07022
alive	2948	-0.0276338	0.458705	0.742279	0.377484	1.94141	0.324308	4.74497	6.03419	1.25643	0	0.877564	5.14707	0.791415
dead	308	0.131558	0.0904402	1.37737	0.0630974	2.08561	0.253012	3.59002	5.41108	2.39059	0	3.70094	3.94043	1.22267
dead	1960	0.550639	1.49367	2.21373	0.267014	0	0.235892	1.68708	3.89288	0.298052	0	3.33108	1.86408	0.212207
dead	1910	0.550817	0.0520504	0.114857	0.012157	0.0526602	1.50955	0.996597	2.50653	0.272313	0	6.90658	1.36029	0.788098
dead	988	-0.0412386	0.25903	1.72195	0.318583	2.08605	1.85549	4.41956	4.9146	1.44296	0	0.244383	7.2684	0.416951
dead	821	0.183034	0.26006	5.32696	0.118109	0	0.0816064	3.92618	2.68778	1.4198	0	0.63441	4.33053	0.0545903
dead	1460	0.725748	0.123842	0.423507	0.660544	0.0291461	0.553645	1.46006	4.50634	0.088626	0.0785843	6.13897	1.36594	0
alive	3708	0.342396	0.0184206	0.520835	0.0127543	0.159668	0.0369748	1.2423	2.22037	0.725943	0	5.63301	4.24657	0.0567778
alive	1197	0.595089	1.38192	1.83365	0.297387	0	0.290519	1.04748	1.71006	0	0.809295	5.28922	2.01463	0.393496
alive	1156	1.58581	11.673	11.9294	8.46631	3.0599	6.2992	9.44971	8.86915	5.07792	10.5711	6.49072	11.9925	2.35147
dead	317	0.60719	1.47655	1.86439	0.803929	0.121369	0.426477	0.858673	2.64712	0	0.70129	4.85417	2.24532	1.70386
alive	1487	0.085683	0.764061	0.384611	0.169656	0.0105072	0.0403669	3.48527	3.24828	0.268117	0.444581	3.25568	5.29897	0.15422
dead	673	0.932417	0.259495	3.06792	0.0446388	0	1.39685	2.26028	11.3828	0.753387	0	2.24337	4.86455	0.0667448
dead	1524	0.539284	0	0.199113	0.0247047	0.184695	0.527888	0.3038	0.750732	0.0985104	0	6.90125	0.970633	0.209325
dead	650	1.12641	0.0287001	3.34253	1.60457	0.134346	0.434878	0.394017	2.128	0	0	7.45368	1.02054	0
alive	772	0.0482616	0.0469872	2.29878	0.170979	0.0428546	0.486748	2.82898	4.34419	4.13484	0.114641	4.88785	4.13715	0.331739
dead	1807	0.11092	1.09126	1.4371	1.15557	0	0.579157	3.58778	2.72667	0.204418	0	2.85857	4.16971	2.12548
alive	7	0.0811043	0.405062	1.92345	0.447836	0.110969	0.675248	3.13059	4.99761	0.980956	0.203937	1.89762	5.29609	2.7226
dead	2004	-0.0128424	0.218729	0.253067	0.0371802	0	1.14025	3.91579	4.26522	0.27933	0	3.39934	5.34137	2.44495
alive	1000	0.982886	9.78458	10.7529	6.72923	2.447	6.64369	7.8346	7.90501	7.97981	9.50074	5.53364	10.0235	1.88978
alive	524	0.786806	0.184337	3.44313	0.0663881	0.499539	0.289017	2.25202	3.41427	0.715688	1.16896	6.90135	4.25724	0
alive	11217	0.143735	0.0397554	1.20153	0.132952	0.0599218	0.54692	2.37636	3.35216	0	0	0.20644	0.376294	0.938392
dead	9061	0.728581	4.39384	6.13244	1.37543	1.30887	1.45001	3.32564	4.13981	4.34496	0.759564	7.55359	5.50737	0.109388
alive	220	0.617741	0.864128	0.435542	5.37488	0.0226306	0.72142	2.89346	3.79207	0.913405	0.257202	4.53303	2.33769	0.650193
dead	549	0.246146	0.343059	2.31433	0.10741	0.315544	0.173828	3.01129	4.23313	1.91953	0	4.14611	5.63444	0
alive	6	0.208346	0	0.844259	0.229697	0.593059	0.796648	1.38261	2.27521	0.501196	0	1.55651	1.21181	0.18609
alive	10	0.000629728	0	0.837717	0.0177331	0.0310179	0.495463	2.80452	1.89663	0.139083	0.123564	7.21582	4.71975	6.92321
alive	21	0.482435	0.0762978	0.775728	0.292989	0.0352447	0.990922	2.19067	2.37437	0.106719	0	6.40334	3.94707	0.11746
alive	6940	0.250876	0.654749	1.25585	0.184059	0.250116	0.771662	2.91953	4.23755	0.638551	0	2.67266	4.41772	0
dead	1917	0.580273	0.969522	5.12126	0.444845	0.540862	0.65523	3.43334	10.1877	4.73946	0	3.66981	4.84793	0.0764504
dead	3683	0.847733	3.07602	6.9765	1.57016	1.90142	0.765735	3.68463	10.0694	4.34925	0	3.8532	4.52465	1.9809
dead	122	0.176261	0	0.117734	0.0248388	0.474133	0.246293	2.0088	2.92954	0.0990313	0	3.71232	2.31238	1.97958
dead	2101	0.420267	0.141575	0.472627	0.0113766	0.0100005	1.57103	1.30354	0.740296	0	0	5.62155	0.983722	0.193012
dead	3379	0.240311	0	1.01707	0.0952854	0	1.39969	1.76285	1.39969	0.822312	0.0863889	4.42246	3.62396	0
dead	1280	-0.133089	1.05426	0.860424	1.42647	1.84219	0.628989	2.9507	4.13363	3.07918	0.11142	0.122315	3.04741	0.202374
alive	6666	0.0622143	0.847592	0.145459	0.0155445	0.0539067	0.402699	3.77527	2.78072	0.7733	0.108795	4.89605	5.20615	0.0689716
dead	3195	0.11266	0.0349808	0.169365	0	0.13338	0.0353305	1.20431	3.3563	0.353407	0.085853	0.623443	1.93629	0.157043
alive	731	0.149323	0.3262	1.45611	0.259706	0.107045	0.0895911	1.69178	3.51803	0.621054	0	0.791778	2.53685	0.956879
alive	1492	0.347748	0.457071	1.57785	0.216837	0	0.431499	3.18799	3.29781	0.554254	0	4.75016	3.12366	0.427607
alive	614	0.376668	0.363876	0.112218	0.842352	0	0.599478	2.37434	2.51756	0.345254	0	6.18423	3.51998	0.534127
dead	1860	0.452842	0.0561908	0.534006	0.101903	0.0343769	0.719279	2.07999	4.50434	0.201292	0	4.07819	1.57381	0.366794
alive	546	-0.376747	0	0.660934	0.296157	0.73034	0.404725	2.20408	2.13008	2.16873	0	3.0679	2.30085	6.11356
alive	3082	-0.166357	0.0418632	0.0701278	0.267184	0.0381754	2.64138	1.00892	5.97544	5.81656	0	3.50396	0.323343	1.57403
alive	1794	0.769336	0.101566	0.558763	0.462593	0.0522821	0.108048	2.60693	6.68486	0.426218	0	7.98745	3.48763	0.845934
alive	2145	0.217175	0.202075	0.355914	0.0296714	0.0261024	1.94302	2.74136	2.09937	0.226561	0	6.54469	5.0698	2.27834
alive	1923	0.421343	0	0.274967	0.893476	0.0154476	0.356801	0.915934	5.48067	0	0	0.909669	1.04195	0.686366
dead	274	0.486133	0.144215	0.84827	0.172658	0.100048	1.79083	1.55126	2.75333	0.199903	0	5.09145	1.19504	0.959129
alive	359	0.187251	0.302158	0.680623	0.0667484	0	2.06332	0.957937	2.1793	0	0	0.655715	1.46161	0.514108
alive	1089	0.498789	0.1208	0.615337	0.568348	0.0302811	0.573528	2.83098	4.56655	0.260087	0	5.64289	4.2449	0.0766463
dead	1506	0.690473	0.220807	0.0332518	0.22827	0.191884	0.199747	1.78899	4.02434	0	0	8.24753	3.12148	0.47245
alive	370	0.291033	0.552029	0.452086	0.619995	0.104971	1.42473	3.33386	5.68657	0.610883	0.107871	4.39515	4.85675	1.85639
alive	1229	-0.140484	0.133252	0.1135	0.0239176	0.0923349	0.748566	2.81755	1.8272	0.751866	0	1.4672	1.66328	0.812007
alive	651	0.43526	0.460274	0.061909	0.831127	0.098705	1.95435	2.38209	4.35876	0	0	4.55803	1.86939	1.63456
alive	760	0.287692	1.09905	0.872685	0.346613	0.0213562	0.280988	3.62803	5.31173	1.12473	0	5.46877	7.06419	0.298865
alive	11	2.06689	12.0874	11.6005	8.73812	10.5147	2.19327	6.13694	5.91532	4.03181	7.69255	8.78301	5.64313	5.57225
alive	417	1.5944	12.6025	12.1521	9.03329	4.44864	6.95672	10.2241	9.61639	6.47205	12.3628	7.71649	13.1365	2.93158
alive	392	1.59711	10.2197	10.0192	5.82277	3.53128	0.996411	6.18802	7.0995	1.4875	5.24146	4.82608	9.95422	1.30369
alive	412	1.46411	11.9878	12.7618	7.97366	3.8529	2.15563	8.92932	8.61533	4.82082	8.32265	6.05903	12.1168	3.86538
dead	393	1.53555	11.6163	12.2105	8.07234	1.66501	5.6012	9.29714	8.24744	5.20986	9.09295	6.72454	12.2834	0.880957
alive	405	0.920309	3.16013	3.64528	0.722595	2.0269	0.0791752	1.90289	3.98043	0.594702	3.17783	6.78333	3.77629	2.07749
alive	403	0.80574	0.604135	1.3114	0.249929	0.0237792	0.114962	1.48381	3.79938	0.207622	0	7.85002	1.33236	0.513503
alive	210	0.713888	0.131763	1.07419	0.0314349	0	0.125959	1.37538	5.31267	0	0	5.59762	3.75618	0
alive	1496	0.46475	2.76335	5.5617	0.447542	0.698057	0.0398153	3.28484	6.03166	3.39993	0	3.80866	6.75356	0.332965
alive	306	1.40329	10.0681	11.2298	7.27492	1.23614	4.22897	7.29198	6.52259	5.56869	10.7979	5.97266	9.35614	0.0554509
dead	1154	0.312725	0.424443	0.570793	0.270076	0.0753205	2.83393	2.13101	2.58355	0.0873205	0	2.65031	1.43013	0.0488879
alive	439	0.262724	0.0485199	0.081154	0.0337022	0.0149029	1.24166	0.617861	2.00099	0	0	1.92204	0.6633	0
alive	839	0.46457	0.881357	0.0658613	0.131454	0.0239844	0.806009	2.74339	3.32902	0.475421	0.0962307	7.03645	1.74671	0.229579
alive	2950	0.432877	0.0348336	0.366712	0.0360909	0.0106639	2.66738	1.50258	1.89438	0	0	4.43944	0.605329	0.0540424
alive	486	0.861351	0.204238	3.9101	0.217122	0.181809	0.518957	2.33984	5.05798	0.209588	1.20944	6.16962	4.80202	1.42453
KRT5, keratin 5; KRT17, keratin 17; PKP1, plakophilin 1; KRT15, keratin 15; FLG, filaggrin; CSTA, cystatin A; CRABP2, cellular retinoic acid binding protein 2; CST6, cystatin E/M; CALML5, Calmodulin Like 5; CDH3, cadherin 3; S100A8, S100 calcium binding protein A8; CTSG,cathepsin G.

## Sheet: lambda.1se
Table SII. LASSO risk score of TCGA-skin cutaneous melanoma patients.
sample_id	event	time	lasso.risk.score
TCGA-Z2-AA3V-06A-11R-A39D-07	0	486	0.588329
TCGA-Z2-AA3S-06A-11R-A39D-07	0	2950	0.128246
TCGA-Z2-A8RT-06A-11R-A37K-07	0	839	0.190318
TCGA-YG-AA3P-06A-11R-A38C-07	0	439	0.1798
TCGA-YG-AA3O-06A-11R-A38C-07	1	1154	0.334446
TCGA-YG-AA3N-01A-11R-A38C-07	0	306	0.399661
TCGA-YD-A9TA-06A-11R-A39D-07	0	1496	0.34111
TCGA-YD-A89C-06A-11R-A37K-07	0	210	0.33524
TCGA-XV-AB01-06A-12R-A40A-07	0	403	0.4989
TCGA-XV-AAZY-01A-12R-A40A-07	0	405	0.491989
TCGA-XV-AAZW-01A-12R-A40A-07	1	393	0.361856
TCGA-XV-AAZV-01A-11R-A40A-07	0	412	0.270974
TCGA-XV-A9W5-01A-11R-A38C-07	0	392	0.343548
TCGA-XV-A9W2-01A-11R-A39D-07	0	417	0.319589
TCGA-XV-A9VZ-01A-11R-A38C-07	0	11	0.289653
TCGA-WE-AAA4-06A-12R-A38C-07	0	760	0.356629
TCGA-WE-AAA3-06A-11R-A38C-07	0	651	0.30023
TCGA-WE-AAA0-06A-11R-A38C-07	0	1229	0.251725
TCGA-WE-AA9Y-06A-12R-A38C-07	0	370	0.284999
TCGA-WE-A8ZY-06A-11R-A37K-07	1	1506	0.298147
TCGA-WE-A8ZX-06A-11R-A37K-07	0	1089	0.0970598
TCGA-WE-A8ZT-06A-11R-A37K-07	0	359	0.206886
TCGA-WE-A8ZR-06A-11R-A37K-07	1	274	0.218563
TCGA-WE-A8ZQ-06A-41R-A37K-07	0	1923	0.269442
TCGA-WE-A8ZO-06A-11R-A37K-07	0	2145	0.210534
TCGA-WE-A8ZN-06A-11R-A37K-07	0	1794	0.372773
TCGA-WE-A8ZM-06A-11R-A37K-07	0	3082	0.32149
TCGA-WE-A8K6-06A-11R-A37K-07	0	546	0.353326
TCGA-WE-A8K5-06A-11R-A37K-07	1	1860	0.325104
TCGA-WE-A8K4-01A-12R-A37K-07	0	614	0.308559
TCGA-WE-A8K1-06A-21R-A37K-07	0	1492	0.366079
TCGA-WE-A8JZ-06A-11R-A37K-07	0	731	0.339644
TCGA-W3-AA21-06A-11R-A38C-07	1	3195	0.352214
TCGA-W3-AA1W-06A-11R-A38C-07	0	6666	0.228594
TCGA-W3-AA1V-06B-11R-A40A-07	1	1280	0.108414
TCGA-W3-AA1R-06A-11R-A39D-07	1	3379	0.429899
TCGA-W3-AA1Q-06A-11R-A38C-07	1	2101	0.180623
TCGA-W3-AA1O-06A-11R-A38C-07	1	122	0.406348
TCGA-W3-A828-06A-11R-A352-07	1	3683	0.329009
TCGA-W3-A825-06A-11R-A352-07	1	1917	0.324855
TCGA-W3-A824-06A-21R-A352-07	0	6940	0.204669
TCGA-RP-A694-06A-11R-A311-07	0	21	0.212672
TCGA-RP-A693-06A-13R-A311-07	0	10	0.296845
TCGA-RP-A690-06A-11R-A311-07	0	6	0.278964
TCGA-QB-AA9O-06A-11R-A39D-07	1	549	0.273213
TCGA-QB-A6FS-06A-11R-A311-07	0	220	0.487277
TCGA-OD-A75X-06A-12R-A32P-07	1	9061	0.195897
TCGA-LH-A9QB-06A-11R-A38C-07	0	11217	0.356089
TCGA-IH-A3EA-01A-11R-A20F-07	0	524	0.508308
TCGA-HR-A5NC-01A-11R-A27Q-07	0	1000	0.109198
TCGA-HR-A2OH-06A-11R-A18U-07	1	2004	0.207219
TCGA-HR-A2OG-06A-21R-A18U-07	0	7	0.28278
TCGA-GN-A9SD-06A-11R-A40A-07	1	1807	0.239827
TCGA-GN-A8LN-01A-11R-A37K-07	0	772	0.370204
TCGA-GN-A8LL-06A-21R-A37K-07	1	650	0.395737
TCGA-GN-A8LK-06A-11R-A37K-07	1	1524	0.400727
TCGA-GN-A4U9-06A-11R-A32P-07	1	673	0.293533
TCGA-GN-A4U8-06A-11R-A32P-07	0	1487	0.253691
TCGA-GN-A4U7-06A-21R-A32P-07	1	317	0.38175
TCGA-GN-A4U5-01A-11R-A32P-07	0	1156	0.196829
TCGA-GN-A4U4-06A-11R-A32P-07	0	1197	0.311968
TCGA-GN-A4U3-06A-11R-A32P-07	0	3708	0.39823
TCGA-GN-A26D-06A-11R-A18T-07	1	1460	0.255229
TCGA-GN-A26C-01A-11R-A18T-07	1	821	0.330683
TCGA-GN-A26A-06A-11R-A18T-07	1	988	0.199284
TCGA-GN-A268-06A-11R-A18T-07	1	1910	0.461528
TCGA-GN-A267-06A-21R-A18T-07	1	1960	0.357057
TCGA-GN-A266-06A-11R-A18T-07	1	308	0.209384
TCGA-GN-A265-06A-21R-A18T-07	0	2948	0.172164
TCGA-GN-A264-06A-11R-A18U-07	1	3587	0.431104
TCGA-GN-A263-01A-11R-A18T-07	1	467	0.105358
TCGA-GN-A262-06A-11R-A18T-07	0	4255	0.0413648
TCGA-GF-A769-01A-32R-A32P-07	1	1070	0.290213
TCGA-GF-A6C9-06A-11R-A311-07	0	480	0.0821711
TCGA-GF-A6C8-06A-12R-A311-07	0	62	0.114749
TCGA-GF-A4EO-06A-12R-A24X-07	0	591	0.131892
TCGA-GF-A3OT-06A-23R-A239-07	0	301	0.253334
TCGA-GF-A2C7-01A-11R-A18T-07	0	21	0.309711
TCGA-FW-A5DY-06A-11R-A311-07	0	587	0.231601
TCGA-FW-A5DX-01A-11R-A27Q-07	0	640	0.419561
TCGA-FW-A3TV-06A-11R-A239-07	0	411	0.131497
TCGA-FW-A3TU-06A-11R-A239-07	1	1691	0.540747
TCGA-FW-A3R5-06A-11R-A239-07	0	1124	0.260383
TCGA-FW-A3I3-06A-11R-A21D-07	0	531	0.285808
TCGA-FS-A4FD-06A-11R-A266-07	1	2454	0.28693
TCGA-FS-A4FC-06A-11R-A24X-07	1	1655	0.349369
TCGA-FS-A4FB-06A-11R-A266-07	1	813	0.281046
TCGA-FS-A4F9-06A-11R-A24X-07	0	1035	0.267602
TCGA-FS-A4F8-06A-11R-A266-07	1	5318	0.200135
TCGA-FS-A4F5-06A-11R-A266-07	1	874	0.353332
TCGA-FS-A4F4-06A-12R-A266-07	1	2028	0.450038
TCGA-FS-A4F2-06A-11R-A24X-07	1	1525	0.314455
TCGA-FS-A4F0-06A-11R-A24X-07	0	2367	0.198934
TCGA-FS-A1ZZ-06A-11R-A18S-07	1	822	0.376663
TCGA-FS-A1ZY-06A-11R-A18S-07	1	824	0.420461
TCGA-FS-A1ZW-06A-12R-A18T-07	0	1505	0.180023
TCGA-FS-A1ZU-06A-12R-A18T-07	1	808	0.352358
TCGA-FS-A1ZT-06A-11R-A18U-07	0	1617	0.354216
TCGA-FS-A1ZS-06A-12R-A18T-07	0	4526	0.235368
TCGA-FS-A1ZR-06A-21R-A18U-07	1	347	0.356963
TCGA-FS-A1ZQ-06A-11R-A18U-07	1	4062	0.346516
TCGA-FS-A1ZP-06A-11R-A18T-07	1	2273	0.298087
TCGA-FS-A1ZN-01A-11R-A18T-07	1	730	0.339535
TCGA-FS-A1ZM-06A-12R-A18S-07	0	3080	0.240886
TCGA-FS-A1ZK-06A-11R-A18T-07	1	728	0.320681
TCGA-FS-A1ZJ-06A-12R-A18S-07	1	1441	0.432605
TCGA-FS-A1ZH-06A-11R-A18T-07	1	996	0.40641
TCGA-FS-A1ZG-06A-11R-A18T-07	1	295	0.45108
TCGA-FS-A1ZF-06A-12R-A18S-07	1	470	0.397765
TCGA-FS-A1ZE-06A-11R-A18T-07	1	1413	0.30658
TCGA-FS-A1ZD-06A-11R-A18T-07	1	1628	0.397799
TCGA-FS-A1ZC-06A-11R-A18T-07	1	10870	0.410389
TCGA-FS-A1ZB-06A-12R-A18S-07	1	1486	0.386774
TCGA-FS-A1ZA-06A-11R-A18T-07	1	843	0.289699
TCGA-FS-A1Z7-06A-11R-A18T-07	1	237	0.256258
TCGA-FS-A1Z4-06A-11R-A18T-07	1	854	0.227973
TCGA-FS-A1Z3-06A-11R-A18T-07	1	636	0.378045
TCGA-FS-A1Z0-06A-11R-A18T-07	1	6164	0.200764
TCGA-FS-A1YY-06A-11R-A18T-07	1	6953	0.355963
TCGA-FS-A1YX-06A-11R-A18T-07	1	1478	0.226969
TCGA-FS-A1YW-06A-11R-A18T-07	1	6598	0.35568
TCGA-FR-A8YE-06A-11R-A37K-07	0	3176	0.156785
TCGA-FR-A8YD-06A-11R-A37K-07	1	1103	0.560428
TCGA-FR-A8YC-06A-11R-A37K-07	1	1059	0.26329
TCGA-FR-A7UA-06A-32R-A352-07	0	1164	0.119098
TCGA-FR-A7U9-06A-11R-A352-07	0	571	0.268029
TCGA-FR-A7U8-06A-21R-A352-07	0	847	0.394377
TCGA-FR-A729-06A-11R-A352-07	0	6716	0.212133
TCGA-FR-A728-01A-11R-A32P-07	0	583	0.249788
TCGA-FR-A726-01A-11R-A32P-07	1	305	0.290984
TCGA-FR-A69P-06A-21R-A311-07	0	478	0.395964
TCGA-FR-A44A-06A-11R-A24X-07	0	5299	0.124081
TCGA-FR-A3YN-06A-11R-A239-07	0	2828	0.29297
TCGA-FR-A3R1-01A-11R-A239-07	0	685	0.238846
TCGA-FR-A2OS-01A-11R-A21D-07	1	368	0.210056
TCGA-ER-A42L-06A-11R-A24X-07	0	4533	0.187949
TCGA-ER-A42K-06A-11R-A24X-07	1	394	0.168443
TCGA-ER-A42H-01A-11R-A24X-07	1	426	0.29703
TCGA-ER-A3PL-06A-11R-A239-07	0	1010	0.360438
TCGA-ER-A3EV-06A-11R-A20F-07	1	1429	0.377274
TCGA-ER-A3ET-06A-11R-A20F-07	1	2829	0.142568
TCGA-ER-A3ES-06A-11R-A20F-07	1	7514	0.233589
TCGA-ER-A2NH-06A-11R-A18S-07	0	1264	0.219291
TCGA-ER-A2NG-06A-11R-A18T-07	1	1490	0.177874
TCGA-ER-A2NF-06A-11R-A18T-07	1	877	0.319261
TCGA-ER-A2NF-01A-11R-A18T-07	1	877	0.364748
TCGA-ER-A2ND-06A-11R-A18T-07	1	710	0.198913
TCGA-ER-A2NC-06A-11R-A18T-07	1	1333	0.267922
TCGA-ER-A2NB-01A-12R-A18S-07	1	857	0.48584
TCGA-ER-A1A1-06A-11R-A18U-07	0	3196	0.189173
TCGA-ER-A19W-06A-41R-A239-07	1	4507	0.191378
TCGA-ER-A19T-06A-11R-A18U-07	1	270	0.278234
TCGA-ER-A19T-01A-11R-A18T-07	1	270	0.393559
TCGA-ER-A19S-06A-11R-A18U-07	0	1505	0.247185
TCGA-ER-A19Q-06A-11R-A18U-07	1	1548	0.300057
TCGA-ER-A19P-06A-11R-A18S-07	1	4930	0.231647
TCGA-ER-A19N-06A-11R-A18S-07	1	1341	0.30107
TCGA-ER-A19M-06A-61R-A239-07	1	1857	0.158297
TCGA-ER-A19L-06A-12R-A18S-07	1	4000	0.110067
TCGA-ER-A19K-01A-21R-A18T-07	1	469	0.231077
TCGA-ER-A19J-06A-11R-A18S-07	1	196	0.423586
TCGA-ER-A19H-06A-12R-A18S-07	1	4634	0.23772
TCGA-ER-A19G-06A-11R-A18U-07	0	9188	0.267182
TCGA-ER-A19F-06A-11R-A18S-07	1	802	0.397669
TCGA-ER-A19E-06A-11R-A18S-07	1	396	0.35858
TCGA-ER-A19D-06A-11R-A18S-07	1	383	0.404154
TCGA-ER-A19C-06A-11R-A18S-07	1	1487	0.25774
TCGA-ER-A19B-06A-11R-A18S-07	1	2993	0.171503
TCGA-ER-A19A-06A-21R-A18U-07	0	2365	0.161426
TCGA-ER-A199-06A-11R-A18T-07	1	279	0.294217
TCGA-ER-A198-06A-11R-A18T-07	1	1544	0.241453
TCGA-ER-A197-06A-32R-A18S-07	1	424	0.196726
TCGA-ER-A196-01A-11R-A18T-07	0	1785	0.311018
TCGA-ER-A195-06A-11R-A18U-07	1	1078	0.255341
TCGA-ER-A194-01A-11R-A18U-07	1	1354	0.442505
TCGA-ER-A193-06A-12R-A18S-07	1	955	0.28228
TCGA-EE-A3JI-06A-11R-A21D-07	1	4648	0.313304
TCGA-EE-A3JH-06A-11R-A21D-07	0	4086	0.265067
TCGA-EE-A3JE-06A-11R-A20F-07	0	1562	0.113308
TCGA-EE-A3JD-06A-11R-A20F-07	1	832	0.102061
TCGA-EE-A3JB-06A-11R-A21D-07	0	6138	0.281536
TCGA-EE-A3JA-06A-11R-A20F-07	1	1618	0.16814
TCGA-EE-A3J8-06A-11R-A20F-07	1	1044	0.147339
TCGA-EE-A3J7-06A-11R-A20F-07	0	1949	0.284495
TCGA-EE-A3J5-06A-11R-A20F-07	1	1124	0.205421
TCGA-EE-A3J4-06A-11R-A20F-07	1	3869	0.356448
TCGA-EE-A3J3-06A-11R-A20F-07	1	5237	0.289209
TCGA-EE-A3AH-06A-11R-A18S-07	1	4222	0.236636
TCGA-EE-A3AG-06A-31R-A18S-07	1	1265	0.231339
TCGA-EE-A3AF-06A-11R-A18S-07	1	420	0.4891
TCGA-EE-A3AD-06A-11R-A18S-07	1	875	0.384518
TCGA-EE-A3AC-06A-11R-A18S-07	0	1948	0.400341
TCGA-EE-A3AB-06A-11R-A18S-07	0	3733	0.272667
TCGA-EE-A3AA-06A-11R-A18S-07	0	3781	0.176636
TCGA-EE-A2MU-06A-21R-A18S-07	0	1620	0.366136
TCGA-EE-A2MT-06A-11R-A18S-07	0	2166	0.280862
TCGA-EE-A2MS-06A-11R-A18S-07	0	4942	0.382193
TCGA-EE-A2MR-06A-11R-A18S-07	0	4088	0.30425
TCGA-EE-A2MQ-06A-11R-A18S-07	1	1315	0.226457
TCGA-EE-A2MP-06A-11R-A18S-07	0	7563	0.361656
TCGA-EE-A2MN-06A-11R-A18S-07	1	1446	0.327838
TCGA-EE-A2MM-06A-11R-A18S-07	1	5107	0.195964
TCGA-EE-A2ML-06A-11R-A18S-07	1	6590	0.211996
TCGA-EE-A2MK-06A-11R-A18S-07	0	5487	0.414743
TCGA-EE-A2MJ-06A-11R-A18S-07	1	2927	0.204425
TCGA-EE-A2MI-06A-11R-A18U-07	1	6225	0.15182
TCGA-EE-A2MH-06A-11R-A18S-07	1	516	0.291247
TCGA-EE-A2MG-06A-11R-A18T-07	1	3139	0.187567
TCGA-EE-A2MF-06A-11R-A21D-07	1	8174	0.217357
TCGA-EE-A2ME-06A-11R-A18T-07	1	3141	0.196991
TCGA-EE-A2MD-06A-11R-A18T-07	1	1438	0.113589
TCGA-EE-A2MC-06A-12R-A18S-07	1	1871	0.242037
TCGA-EE-A2M8-06A-12R-A18S-07	1	601	0.138123
TCGA-EE-A2M7-06A-11R-A18U-07	1	877	0.375091
TCGA-EE-A2M6-06A-12R-A18S-07	0	3932	0.226328
TCGA-EE-A2M5-06A-12R-A18S-07	1	659	0.374593
TCGA-EE-A2GU-06A-11R-A18T-07	0	2884	0.316721
TCGA-EE-A2GT-06A-12R-A18S-07	0	1365	0.344509
TCGA-EE-A2GS-06A-12R-A18S-07	1	2470	0.355081
TCGA-EE-A2GR-06A-11R-A18S-07	1	1301	0.304125
TCGA-EE-A2GP-06A-11R-A18S-07	1	423	0.361846
TCGA-EE-A2GO-06A-11R-A18S-07	0	3857	0.352024
TCGA-EE-A2GN-06A-11R-A18S-07	1	3106	0.279126
TCGA-EE-A2GM-06B-11R-A18S-07	0	2296	0.264059
TCGA-EE-A2GL-06A-11R-A18S-07	0	2423	0.275747
TCGA-EE-A2GK-06A-11R-A18S-07	0	1665	0.187525
TCGA-EE-A2GJ-06A-11R-A18U-07	1	3266	0.32243
TCGA-EE-A2GI-06A-11R-A18T-07	0	1482	0.278014
TCGA-EE-A2GH-06A-11R-A18T-07	0	6699	0.169303
TCGA-EE-A2GE-06A-11R-A18T-07	0	5286	0.290311
TCGA-EE-A2GD-06A-11R-A18T-07	1	10346	0.218751
TCGA-EE-A2GC-06A-11R-A18T-07	0	2051	0.227569
TCGA-EE-A2GB-06A-11R-A18T-07	0	1803	0.336896
TCGA-EE-A2A6-06A-11R-A18T-07	0	2620	0.358636
TCGA-EE-A2A5-06A-11R-A18T-07	1	1195	0.239453
TCGA-EE-A2A2-06A-11R-A18T-07	0	1814	0.399885
TCGA-EE-A2A1-06A-11R-A18T-07	0	3527	0.349953
TCGA-EE-A2A0-06A-11R-A18T-07	1	1424	0.0080751
TCGA-EE-A29X-06A-11R-A18T-07	1	545	0.49882
TCGA-EE-A29V-06A-12R-A18S-07	1	787	0.543712
TCGA-EE-A29T-06A-11R-A18T-07	0	11252	0.349115
TCGA-EE-A29S-06A-11R-A18T-07	1	1864	0.379472
TCGA-EE-A29R-06A-11R-A18T-07	0	440	0.285367
TCGA-EE-A29Q-06A-11R-A18T-07	1	2030	0.30989
TCGA-EE-A29P-06A-11R-A18T-07	0	1716	0.227468
TCGA-EE-A29N-06A-12R-A18S-07	1	566	0.139424
TCGA-EE-A29M-06A-11R-A18T-07	0	1729	0.37735
TCGA-EE-A29L-06A-12R-A18S-07	1	79	0.375357
TCGA-EE-A29H-06A-12R-A18S-07	0	1966	0.587621
TCGA-EE-A29G-06A-12R-A18T-07	1	2192	0.337549
TCGA-EE-A29E-06A-11R-A18T-07	0	1940	0.282688
TCGA-EE-A29D-06A-11R-A18T-07	1	425	0.344632
TCGA-EE-A29C-06A-21R-A18S-07	1	2402	0.384214
TCGA-EE-A29B-06A-11R-A18U-07	1	2588	0.356548
TCGA-EE-A29A-06A-12R-A18U-07	1	1927	0.452499
TCGA-EE-A20I-06A-11R-A18U-07	1	412	0.440024
TCGA-EE-A20H-06A-11R-A18S-07	1	5118	0.323824
TCGA-EE-A20F-06A-21R-A18S-07	0	2785	0.0698846
TCGA-EE-A20B-06A-11R-A18U-07	0	4070	0.367734
TCGA-EE-A185-06A-11R-A18S-07	1	151	0.495682
TCGA-EE-A184-06A-11R-A18S-07	1	2073	0.52759
TCGA-EE-A182-06A-11R-A18T-07	1	447	0.658487
TCGA-EE-A181-06A-11R-A18S-07	1	1026	0.302103
TCGA-EE-A180-06A-11R-A21D-07	1	2889	0.45076
TCGA-EE-A17Z-06A-11R-A18S-07	1	263	0.231086
TCGA-EE-A17Y-06A-11R-A18T-07	1	828	0.312364
TCGA-EE-A17X-06A-11R-A18S-07	1	907	0.460527
TCGA-EB-A97M-01A-11R-A38C-07	0	414	0.512212
TCGA-EB-A85J-01A-12R-A352-07	0	360	0.189729
TCGA-EB-A85I-01A-11R-A352-07	0	362	0.25652
TCGA-EB-A82C-01A-11R-A352-07	0	17	0.267221
TCGA-EB-A82B-01A-11R-A352-07	0	390	0.186975
TCGA-EB-A6R0-01A-12R-A32P-07	1	608	0.21431
TCGA-EB-A6QZ-01A-12R-A32P-07	1	352	0.300164
TCGA-EB-A6QY-01A-12R-A32P-07	0	382	0.167181
TCGA-EB-A6L9-06A-11R-A32P-07	0	1109	0.291661
TCGA-EB-A5VV-06A-11R-A32P-07	0	214	0.072094
TCGA-EB-A5VU-01A-21R-A32P-07	1	321	0.320576
TCGA-EB-A5UN-06A-11R-A311-07	0	1792	0.270101
TCGA-EB-A5UM-01A-11R-A311-07	0	779	0.345089
TCGA-EB-A5UL-06A-11R-A311-07	0	891	0.221719
TCGA-EB-A5SH-06A-11R-A311-07	0	1643	0.433912
TCGA-EB-A5SG-06A-11R-A311-07	0	2076	0.178398
TCGA-EB-A5SF-01A-11R-A311-07	1	369	0.513374
TCGA-EB-A5SE-01A-11R-A311-07	1	401	0.459647
TCGA-EB-A5KH-06A-11R-A27Q-07	1	619	0.296313
TCGA-EB-A5FP-01A-11R-A27Q-07	1	454	0.386117
TCGA-EB-A57M-01A-51R-A311-07	1	472	0.442253
TCGA-EB-A553-01A-12R-A27Q-07	0	226	0.26194
TCGA-EB-A551-01A-21R-A27Q-07	0	590	0.0107926
TCGA-EB-A550-01A-61R-A27Q-07	1	264	0.191135
TCGA-EB-A51B-01A-11R-A27Q-07	0	931	0.26351
TCGA-EB-A4XL-01A-11R-A27Q-07	0	777	0.218113
TCGA-EB-A4P0-01A-41R-A266-07	1	326	0.236803
TCGA-EB-A4OZ-01A-12R-A266-07	0	620	0.382575
TCGA-EB-A4OY-01A-11R-A266-07	0	977	0.415566
TCGA-EB-A4IS-01A-21R-A266-07	0	774	0.174796
TCGA-EB-A4IQ-01A-12R-A266-07	1	636	0.369903
TCGA-EB-A44R-06A-41R-A266-07	1	315	0.230238
TCGA-EB-A44Q-06A-11R-A266-07	0	422	0.154619
TCGA-EB-A44P-01A-11R-A266-07	0	741	0.301253
TCGA-EB-A44O-01A-11R-A266-07	0	81	0.404382
TCGA-EB-A44N-01A-11R-A266-07	1	205	0.294111
TCGA-EB-A431-01A-11R-A266-07	0	568	0.279067
TCGA-EB-A42Z-01A-12R-A24X-07	0	441	0.359408
TCGA-EB-A42Y-01A-12R-A24X-07	1	721	0.328948
TCGA-EB-A41B-01A-11R-A24X-07	0	291	0.27351
TCGA-EB-A41A-01A-11R-A24X-07	0	262	0.255386
TCGA-EB-A3Y7-01A-11R-A239-07	1	326	0.23405
TCGA-EB-A3Y6-01A-21R-A239-07	0	126	0.586143
TCGA-EB-A3XF-01A-31R-A239-07	0	278	0.357547
TCGA-EB-A3XE-01A-12R-A239-07	0	180	0.209056
TCGA-EB-A3XD-01A-22R-A239-07	0	1160	0.294383
TCGA-EB-A3XC-01A-11R-A239-07	0	650	0.39108
TCGA-EB-A3XB-01A-11R-A239-07	0	796	0.282717
TCGA-EB-A3HV-01A-11R-A21D-07	0	39	0.246727
TCGA-EB-A299-01A-21R-A18U-07	0	378	0.389038
TCGA-EB-A24D-01A-11R-A18T-07	0	645	0.25077
TCGA-EB-A24C-01A-11R-A18T-07	0	632	0.386834
TCGA-EB-A1NK-01A-11R-A18T-07	0	1039	0.180436
TCGA-DA-A960-01A-11R-A37K-07	0	804	0.380529
TCGA-DA-A95Z-06A-11R-A37K-07	0	396	0.467351
TCGA-DA-A95Y-06A-11R-A37K-07	1	430	0.309245
TCGA-DA-A95X-06A-11R-A37K-07	0	2249	0.443145
TCGA-DA-A95W-06A-11R-A37K-07	0	1136	0.337719
TCGA-DA-A95V-06A-11R-A37K-07	0	2193	0.320948
TCGA-DA-A3F8-06A-11R-A20F-07	0	1319	0.37673
TCGA-DA-A3F5-06A-11R-A20F-07	1	6873	0.199722
TCGA-DA-A3F3-06A-11R-A20F-07	1	319	0.306946
TCGA-DA-A3F2-06A-11R-A20F-07	1	1032	0.183687
TCGA-DA-A1IC-06A-11R-A18S-07	1	2071	0.442382
TCGA-DA-A1IB-06A-11R-A18S-07	0	825	0.391983
TCGA-DA-A1IA-06A-11R-A18S-07	1	2005	0.144394
TCGA-DA-A1I8-06A-11R-A18T-07	1	1640	0.649175
TCGA-DA-A1I7-06A-22R-A18S-07	0	2703	0.295303
TCGA-DA-A1I5-06A-11R-A18T-07	0	4107	0.271769
TCGA-DA-A1I4-06A-11R-A18U-07	1	1093	0.192563
TCGA-DA-A1I2-06A-21R-A18U-07	1	5370	0.206563
TCGA-DA-A1I1-06A-12R-A18U-07	0	6768	0.212016
TCGA-DA-A1I0-06A-11R-A20F-07	1	620	0.298728
TCGA-DA-A1HY-06A-11R-A18T-07	0	4407	0.536125
TCGA-DA-A1HW-06A-11R-A18U-07	0	820	0.374935
TCGA-DA-A1HV-06A-21R-A18S-07	0	2329	0.0977891
TCGA-D9-A6EG-06A-12R-A32P-07	1	698	0.275344
TCGA-D9-A6EC-06A-11R-A311-07	0	2359	0.413903
TCGA-D9-A6EA-06A-11R-A311-07	0	766	0.219428
TCGA-D9-A6E9-06A-12R-A311-07	0	301	0.401888
TCGA-D9-A4Z6-06A-12R-A266-07	1	561	0.196916
TCGA-D9-A4Z5-01A-11R-A266-07	0	218	0.171546
TCGA-D9-A4Z3-01A-11R-A266-07	0	505	0.290048
TCGA-D9-A4Z2-01A-11R-A24X-07	1	190	0.2832
TCGA-D9-A3Z4-01A-11R-A239-07	1	519	0.216376
TCGA-D9-A3Z3-06A-11R-A239-07	0	678	0.291072
TCGA-D9-A3Z1-06A-11R-A239-07	1	468	0.317971
TCGA-D9-A1X3-06A-11R-A18S-07	0	551	0.170992
TCGA-D9-A1JX-06A-11R-A18S-07	1	216	0.263656
TCGA-D9-A1JW-06A-11R-A18S-07	0	111	0.353499
TCGA-D9-A149-06A-11R-A18S-07	0	1663	0.418793
TCGA-D9-A148-06A-11R-A18S-07	0	4609	0.489677
TCGA-D3-A8GV-06A-11R-A37K-07	1	5101	0.393111
TCGA-D3-A8GS-06A-12R-A37K-07	1	3564	0.318418
TCGA-D3-A8GQ-06A-11R-A37K-07	1	884	0.206574
TCGA-D3-A8GP-06A-11R-A37K-07	0	4646	0.413278
TCGA-D3-A8GN-06A-11R-A37K-07	0	4897	0.27696
TCGA-D3-A8GM-06A-11R-A37K-07	1	3259	0.2971
TCGA-D3-A8GL-06A-11R-A37K-07	1	2711	0.319835
TCGA-D3-A8GK-06A-11R-A37K-07	0	5177	0.444875
TCGA-D3-A8GJ-06A-11R-A37K-07	0	7342	0.383308
TCGA-D3-A8GI-06A-11R-A37K-07	1	1780	0.200023
TCGA-D3-A8GE-06A-11R-A37K-07	0	804	0.585537
TCGA-D3-A8GD-06A-11R-A37K-07	0	718	0.276771
TCGA-D3-A8GC-06A-11R-A37K-07	1	2421	0.234204
TCGA-D3-A8GB-06A-11R-A37K-07	1	938	0.128426
TCGA-D3-A5GU-06A-11R-A27Q-07	0	3808	0.127885
TCGA-D3-A5GT-01A-12R-A311-07	0	487	0.236171
TCGA-D3-A5GS-06A-11R-A27Q-07	0	553	0.394
TCGA-D3-A5GR-06A-11R-A27Q-07	0	5424	0.30449
TCGA-D3-A5GO-06A-12R-A27Q-07	0	4195	0.294561
TCGA-D3-A5GN-06A-11R-A27Q-07	0	4129	0.23901
TCGA-D3-A5GL-06A-11R-A27Q-07	0	3826	0.254528
TCGA-D3-A51T-06A-11R-A266-07	0	818	0.27229
TCGA-D3-A51R-06A-11R-A266-07	0	1941	0.390451
TCGA-D3-A51N-06A-11R-A266-07	0	688	0.322442
TCGA-D3-A51K-06A-11R-A266-07	0	1002	0.233295
TCGA-D3-A51J-06A-11R-A266-07	0	4414	0.362801
TCGA-D3-A51H-06A-12R-A266-07	0	1714	0.254566
TCGA-D3-A51F-06A-11R-A266-07	0	1695	0.102619
TCGA-D3-A51E-06A-11R-A266-07	0	5318	0.180946
TCGA-D3-A3MV-06A-11R-A21D-07	0	1378	0.266265
TCGA-D3-A3MU-06A-11R-A21D-07	0	1209	0.394557
TCGA-D3-A3MR-06A-11R-A21D-07	0	3151	0.425749
TCGA-D3-A3MO-06A-11R-A21D-07	1	284	0.216876
TCGA-D3-A3ML-06A-11R-A21D-07	1	422	0.305216
TCGA-D3-A3CF-06A-11R-A18T-07	1	746	0.412874
TCGA-D3-A3CE-06A-11R-A18S-07	1	1832	0.276341
TCGA-D3-A3CC-06A-11R-A18S-07	0	2644	0.227598
TCGA-D3-A3CB-06A-11R-A18S-07	0	5065	0.201272
TCGA-D3-A3C8-06A-12R-A18S-07	0	1409	0.304631
TCGA-D3-A3C7-06A-11R-A18U-07	0	1429	0.140812
TCGA-D3-A3C6-06A-12R-A18U-07	1	1766	0.22493
TCGA-D3-A3BZ-06A-12R-A18S-07	0	3976	0.292429
TCGA-D3-A2JP-06A-11R-A18S-07	0	1812	0.234222
TCGA-D3-A2JO-06A-11R-A18S-07	0	2010	0.224599
TCGA-D3-A2JN-06A-11R-A18S-07	1	2022	0.277628
TCGA-D3-A2JL-06A-11R-A18S-07	0	5219	0.276502
TCGA-D3-A2JK-06A-11R-A18S-07	1	368	0.249392
TCGA-D3-A2JH-06A-11R-A18T-07	0	1280	0.488106
TCGA-D3-A2JG-06A-11R-A18T-07	1	3453	0.294352
TCGA-D3-A2JF-06A-11R-A18S-07	0	1888	0.18003
TCGA-D3-A2JE-06A-11R-A37K-07	1	841	0.334755
TCGA-D3-A2JD-06A-11R-A18T-07	1	361	0.306052
TCGA-D3-A2JC-06A-11R-A18T-07	0	2639	0.4652
TCGA-D3-A2JA-06A-11R-A18T-07	0	3514	0.214705
TCGA-D3-A2J9-06A-11R-A18T-07	1	723	0.326464
TCGA-D3-A2J8-06A-11R-A18T-07	1	1992	0.179243
TCGA-D3-A2J7-06A-11R-A18T-07	1	3136	0.320411
TCGA-D3-A2J6-06A-11R-A18T-07	1	1321	0.177893
TCGA-D3-A1QB-06A-11R-A18T-07	0	2912	0.356457
TCGA-D3-A1QA-07A-11R-A37K-07	0	2765	0.245794
TCGA-D3-A1QA-06A-11R-A18T-07	0	2765	0.265602
TCGA-D3-A1Q9-06A-11R-A18T-07	1	961	0.224425
TCGA-D3-A1Q8-06A-11R-A18T-07	1	854	0.243042
TCGA-D3-A1Q7-06A-11R-A18T-07	0	4053	0.209215
TCGA-D3-A1Q6-06A-11R-A18T-07	1	2184	0.14353
TCGA-D3-A1Q5-06A-11R-A18T-07	1	3424	0.280704
TCGA-D3-A1Q4-06A-11R-A18T-07	0	3408	0.295759
TCGA-D3-A1Q3-06A-11R-A18T-07	1	507	0.258523
TCGA-D3-A1Q1-06A-21R-A18T-07	1	504	0.351175
TCGA-BF-AAP8-01A-11R-A40A-07	0	447	0.210884
TCGA-BF-AAP7-01A-11R-A40A-07	0	318	0.329689
TCGA-BF-AAP6-01A-11R-A40A-07	0	325	0.399234
TCGA-BF-AAP4-01A-11R-A40A-07	0	335	0.269468
TCGA-BF-AAP2-01A-11R-A40A-07	0	405	0.411802
TCGA-BF-AAP1-01A-11R-A39D-07	0	409	0.435272
TCGA-BF-AAP0-06A-11R-A39D-07	0	454	0.157101
TCGA-BF-AAOX-01A-11R-A39D-07	0	444	0.29545
TCGA-BF-AAOU-01A-12R-A39D-07	0	476	0.0901604
TCGA-BF-A9VF-01A-11R-A37K-07	0	440	0.378181
TCGA-BF-A5ES-01A-11R-A27Q-07	0	490	0.314307
TCGA-BF-A5ER-01A-12R-A27Q-07	0	327	0.645213
TCGA-BF-A5EQ-01A-21R-A27Q-07	0	323	0.199091
TCGA-BF-A5EP-01A-12R-A27Q-07	0	335	0.265642
TCGA-BF-A5EO-01A-12R-A27Q-07	0	703	0.538478
TCGA-BF-A3DN-01A-11R-A20F-07	0	717	0.304692
TCGA-BF-A3DM-01A-11R-A20F-07	0	601	0.297238
TCGA-BF-A3DL-01A-11R-A20F-07	0	769	0.529896
TCGA-BF-A3DJ-01A-11R-A20F-07	0	464	0.297037
TCGA-BF-A1Q0-01A-21R-A18S-07	0	831	0.218916
TCGA-BF-A1PZ-01A-11R-A18S-07	0	853	0.449156
TCGA-BF-A1PX-01A-12R-A18T-07	1	282	0.288356
TCGA-BF-A1PV-01A-11R-A18U-07	0	14	0.405333
TCGA-BF-A1PU-01A-11R-A18S-07	0	387	0.351394
TCGA-3N-A9WD-06A-11R-A38C-07	1	395	0.266249
TCGA-3N-A9WC-06A-11R-A38C-07	0	2022	0.224825
TCGA-3N-A9WB-06A-11R-A38C-07	1	518	0.384226
TCGA, The Cancer Genome Atlas; LASSO, least absolute shrinkage and selection operator.
